# Supplementary material for: Role, structure and effects of medical tourism in Africa: a systematic scoping review protocol
Source: PubMed Central journal article supplement — BMJ Open. 2017 Jun 23;7(6):e013021. doi: 10.1136/bmjopen-2016-013021 (PMC5541447; doi:10.1136/bmjopen-2016-013021), 2017-06-23
Supplement: bmjopen-2016-013021.draft_revisions.pdf [file bmjopen-2016-013021.draft_revisions.pdf]

# BMJ Open

## The Role, Structure and Effect of Medical Tourism in Africa: A Systematic Scoping Review Protocol

|                                 |                                                                                                                                                                                                                                                                                                                                                                                                                           |
|---------------------------------|---------------------------------------------------------------------------------------------------------------------------------------------------------------------------------------------------------------------------------------------------------------------------------------------------------------------------------------------------------------------------------------------------------------------------|
| Journal:                        | <i>BMJ Open</i>                                                                                                                                                                                                                                                                                                                                                                                                           |
| Manuscript ID                   | bmjopen-2016-013021                                                                                                                                                                                                                                                                                                                                                                                                       |
| Article Type:                   | Protocol                                                                                                                                                                                                                                                                                                                                                                                                                  |
| Date Submitted by the Author:   | 18-Jun-2016                                                                                                                                                                                                                                                                                                                                                                                                               |
| Complete List of Authors:       | Mogaka, John; University of KwaZulu-Natal College of Health Sciences, Discipline of Public Health Medicine<br>Tsoka-Gwegweni, Joyce; University of KwaZulu-Natal College of Health Sciences, Discipline of Public Health Medicine<br>Mupara, Lucia; University of KwaZulu-Natal College of Health Sciences, Discipline of Public Health Medicine<br>Mashamba-Thompson, Tivani; University of KwaZulu Natal, Public Health |
| <b>Primary Subject Heading</b>: | Global health                                                                                                                                                                                                                                                                                                                                                                                                             |
| Secondary Subject Heading:      | Health services research, Health policy, Health economics, Public health, Research methods                                                                                                                                                                                                                                                                                                                                |
| Keywords:                       | HEALTH SERVICES ADMINISTRATION & MANAGEMENT, Health economics < HEALTH SERVICES ADMINISTRATION & MANAGEMENT, Health policy < HEALTH SERVICES ADMINISTRATION & MANAGEMENT, MEDICAL ETHICS, PUBLIC HEALTH, SOCIAL MEDICINE                                                                                                                                                                                                  |
|                                 |                                                                                                                                                                                                                                                                                                                                                                                                                           |

SCHOLARONE™  
Manuscripts

Only

# The Role, Structure and Effect of Medical Tourism in Africa: A Systematic Scoping Review Protocol

**John J O Mogaka<sup>a</sup>**

**Joyce M Tsoka-Gwegweni<sup>1,a</sup>**

**Lucia M Mupara<sup>a</sup>**

**Tivani Mashamba-Thompson<sup>a</sup>**

---

<sup>a</sup> Discipline of Public Health Medicine,  
School of Nursing and Public Health,  
University of KwaZulu Natal,  
Durban, South Africa

<sup>1</sup> Correspondence should be addressed to  
Prof. Joyce M Tsoka-Gwegweni  
Discipline of Public Health Medicine,  
School of Nursing and Public Health,  
University of KwaZulu Natal,  
Howard College Campus,  
Mazisi Kunene Avenue,  
Durban, 4041, South Africa

Email address: [Tsokagwegweni@ukzn.ac.za](mailto:Tsokagwegweni@ukzn.ac.za)

## Abstract

**Introduction:** Africa both sends and receives patients who form part of a growing global phenomenon variously referred to as medical or health tourism, the practice of travelling abroad to consume health care services. Evidence suggest that, if resources generated through medical tourism are equitably used in supplementing local primary health care, medical tourism can significantly impact health care provision in Africa. Currently, however, the understanding of this important component of health care in Africa is inadequate. This study seeks to determine the level of knowledge on the role, structure and effect of medical tourism in Africa.

**Methods:** We will conduct a systematic scoping review to outline the role, structure and effect of medical tourism in Africa. Databases: Academic Search Complete, Business Source Complete, PsycARTICLES (EBSCO), PsycINFO (EBSCO). Studies will be mapped in two stages. Stage 1: Mapping the studies based on the relevance of their titles and subject descriptors. Stage 2: Applying further inclusion criteria on studies from stage 1. Two reviewers will independently assess study quality and abstract data. Both quantitative and qualitative data analysis will be performed, using STATA 13 and NVIVO respectively.

**Ethics and dissemination:** This protocol has been registered in PROSPERO (**Regn. No. CRD42016039745**) available at <http://www.crd.york.ac.uk/PROSPERO>. The study will be disseminated electronically and in print. It will also be presented at conferences related to medical tourism, public health, health systems strengthening, health care delivery and tourism.

**Discussion:** Medical tourism spurs cutting-edge medical technologies, techniques and best practices in healthcare delivery. While castigated for promoting healthcare inequity by some, medical tourism is likely to be a solution to many economical healthcare problems in Africa. By elucidating

1  
2  
3 the role, structure and effect of this phenomenon, this study will contribute  
4 to health systems strengthening in Africa.  
5  
6  
7  
8  
9

### 10 **Strengths and limitations of this study**

- 13 • This study offers a 'big picture' analysis of medical tourism (MT) in  
14 Africa by synthesizing vast amounts of literature on the subject.
- 15 • This scoping review offers an ideal platform for synthesizing literature  
16 on MT in Africa whose methodological approaches, settings, study  
17 populations and behaviours are wide-ranging.
- 18 • This approach of synthesising literature, however, presents a limitation  
19 in that a detailed analysis of case specific interventions and quality  
20 assessment of individual studies is not applicable.
- 21 • As the study will only include literature published in English, studies  
22 published in other languages will be omitted. Searching literature  
23 using only one language, in this case English, is a limitation. However,  
24 research shows that almost 70% -90% of published works are in  
25 English [1]. This fact minimizes adverse effects of searching  
26 publications written only in English.
- 27 • To our knowledge there is paucity of scientific study on MT in Africa.  
28 While this may be a possible limitation in terms of the amount of data  
29 for this scoping review, it may be an important finding of this study  
30 and a basis for calling for more research in this area.  
31  
32  
33  
34  
35  
36  
37  
38  
39  
40  
41  
42  
43  
44  
45  
46  
47  
48  
49  
50

- 51 1. Pickering, C. and J. Byrne, *The benefits of publishing systematic quantitative literature reviews*  
52 *for PhD candidates and other early-career researchers*. Higher Education Research &  
53 *Development*, 2014. **33**(3): p. 534-548.  
54  
55  
56  
57  
58  
59  
60

## Introduction

Africa both sends and receives patients as part of a global phenomenon of over five million patients a year travelling abroad to consume health care services that are either unaffordable, too delayed, unavailable, or proscribed at home[1, 2]. This practice has been referred to as medical, health or wellness tourism among other names [1, 3-5].

The role medical tourism(MT) plays in the economies of many African countries, though imprecise, has nevertheless been recognized[6-8]. This role includes health care provision. The wealthy middle class in Africa, for instance, regularly seek advanced medical care abroad [9]. Beside the economic contribution above, the role MT plays in either aggravating or alleviating health care ills in Africa is inadequately known[10-13]. These healthcare ills range from high morbidity and mortality from infectious diseases such as malaria, tuberculosis and HIV/AIDS, to increased incidences of non-communicable conditions in the form of cardiovascular diseases, cancer and respiratory diseases [14, 15], besides an exodus of vital health care workforce from Africa[16-18].

Specialized medical services and procedures offered to medical tourists include elective, non-elective and diagnostic as depicted in Fig.1.

However, current availability, pricing and geo-distribution of these procedures and services in Africa is not well-known.

Medical tourism entails highly trained and experienced physicians, high-tech medical equipment and specialised ultramodern medical facilities. Some African countries are said to have invested in or attracted ample pool of specialist physicians in quality private hospitals whose medical investigation facilities are at par with international yardsticks, similar to the ones in developed countries[19]. Costs associated with these MT infrastructure are substantial[10]. Similarly, MT is said to cause competition for best local

1  
2  
3 resources including qualified medical professionals [8, 10] and transplant  
4 organs. The accrued benefits to the local host population, in turn, is  
5 however, not well-known.  
6  
7

8  
9  
10 Many arguments have been advanced for and against MT in Africa. Fig.2  
11 [10] summarizes these advantages and disadvantages.  
12

13  
14 The extent and dimension of these pros and cons in Africa, however, is  
15 inexact [2, 3, 10, 11, 13, 20-22].  
16

17  
18 The growing phenomenon of MT in Africa needs to be well understood and  
19 documented in the face of Africa's pervasive poverty and pricy private health  
20 care, in an effort to strengthen healthcare systems.  
21  
22

23  
24 It is likely that many MT facilities in Africa meet international health care  
25 standards; but do they meet local population expectations? Does MT  
26 consume and diminish local resources it is built on? What are the terms of  
27 reference for most public agencies promoting MT across Africa? What is the  
28 policy and regulatory framework for MT across Africa?  
29

30  
31 Individual health care, population health and public policy decisions must be  
32 premised on best available evidence to avoid poor and inappropriate  
33 interventions [4, 13, 21, 23-25]. However, for MT in Africa, this is clearly  
34 difficult because of paucity of scientific evidence on the subject. Secondly,  
35 even with the available evidence, the information generated individually by  
36 the studies may be biased, methodologically flawed, time and context  
37 constrained, resulting in conflicting conclusions. This does not allow MT in  
38 Africa to be understood in its entirety [26]. Hence the necessity and  
39 justification of this scoping review.  
40  
41

42  
43 The purpose of this study, therefore, is to assess current level of knowledge  
44 on MT in Africa by systematically reviewing available literature on the  
45 subject.  
46  
47  
48  
49  
50

1  
2  
3  
4  
5  
6  
7  
8  
9  
10  
11  
12  
13  
14  
15  
16  
17  
18  
19  
20  
21  
22  
23  
24  
25  
26  
27  
28  
29  
30  
31  
32  
33  
34  
35  
36  
37  
38  
39  
40  
41  
42  
43  
44  
45  
46  
47  
48  
49  
50  
51  
52  
53  
54  
55  
56  
57  
58  
59  
60

The main aim of this study is to outline the role, structure and effect of medical tourism in Africa by answering the following specific questions:

- i. What is published about the availability, pricing and geo-distribution of specialized medical procedures and services offered to medical tourists in Africa?
- ii. Who are the main medical tourism actors in Africa, as identified in the literature?
- iii. What is published about the main guidelines from government agencies and professional societies that influence the regulation and practice of medical tourism in Africa?
- iv. What are the identified ethical issues associated with medical tourism in Africa?

## Methods

The study will employ Arksey and O'Malley scoping review framework as well as incorporate recent scoping review suggestions by Levac et al[27, 28].

### Identification of relevant studies

#### a) Key terms

Multiple terms are used to refer to MT in literature. Therefore, an extensive list of primary and secondary search terms as well as filtering methods will be developed. Search terms will include: medical tourism, stem cell tourism, fertility tourism, dental tourism, health tourism and transplant tourism with Africa as the bounding parameter. The university librarian will help in finalizing the keyword and search strategy in this study. Publications will be obtained as open source and institutional subscriptions (University of KwaZulu Natal). However, an attempt will be made to obtain relevant documents that are not readily available through concerned authors or publishers.

b) Databases:

Academic databases: Academic Search Complete, Business Source Complete, PsycARTICLES (EBSCO), PsycINFO (EBSCO), Health Source - Consumer Edition, Health Source- Nursing/Academic Edition and sabinet.

Search engines: Google and google scholar.

Relevant MT industry associations, OECD, WHO, Worldbank and other multilateral organizations' websites will be used to search for government policy papers, practice guidelines and industry reports.

Relevant research dissertations through worldcat via oclc, and reference list scanning of included studies.

c) Search strategy:

The databases selected will cover a broad range of disciplines to ensure sensitivity. Search queries will be tailored to specific requirements for each database. For academic databases, keywords will be combined using Boolean operators (AND, OR, NOT). A snowball technique will be used to find relevant related and cited works.

However, since this will be an iterative process, details will be documented in the analysis and write up of the full review.

Researchers will keep an updated record on dates and the numbers of publications identified during each session of literature search using the table below:

| Date | Keyword searched | Search engine used | Number of publications retrieved |
|------|------------------|--------------------|----------------------------------|
|      |                  |                    |                                  |



1  
2  
3 Table 1: Electronic search record  
4  
5

6 **Study Selection (Screening)**  
7

8 A two-stage screening process will be used to assess the relevance of  
9 studies identified in the search. Two reviewers will independently evaluate  
10 and apply the identified selection criteria to the candidate literature titles  
11 and abstracts. Titles and abstracts will be screened as “include”, “exclude” or  
12 “uncertain”. Full text of articles screened as “uncertain” will be reviewed by  
13 the third reviewer for verification against the inclusion criteria. During the  
14 first stage, only the title and abstract of citations will be reviewed to  
15 preclude articles that do not meet the minimum inclusion criteria. A title and  
16 abstract relevance screening form will be developed and pretested on a  
17 convenience sample of 10 academic citations to evaluate reviewer  
18 agreement. A kappa calculation will be done based on the results of this pre-  
19 test. This will in turn be used to show the reviewers’ inter-rater agreement  
20 level. Generally, a kappa score over 0.8 is considered a high level of  
21 agreement [29]. In accordance with recommendations by Levac et al.[28],  
22 after reviewing every batch of 20 to 30 publications, the reviewers will meet  
23 to resolve any conflicts and ensure consistency with the research question  
24 and purpose.  
25  
26  
27  
28  
29  
30  
31  
32  
33  
34  
35  
36  
37  
38  
39

40 Executive summaries in grey literature will be treated as abstracts. Relevant  
41 titles whose abstracts are not available will be taken to screening stage two  
42 for full review. During screening stage two, reviewers will independently  
43 screen the rest of the search results using the pre-defined inclusion-  
44 exclusion criteria. Any ensuing discrepancies will be resolved by discussion  
45 or the involvement of the third reviewer.  
46  
47  
48  
49  
50  
51

52 To capture and present the screening process, the Preferred Reporting Items  
53 for Systematic and Meta- Analyses (PRISMA) flow diagram in Fig.3 [30] will  
54 be used.  
55  
56  
57  
58  
59  
60

1  
2  
3  
4  
5  
6 Inclusion criteria:  
7  
8

- 9 • Evidence published in English.
- 10 • There will be no publication date restrictions up to 06 June 2016.
- 11 • Literature with substantial focus on MT in Africa including: peer-  
12 reviewed journal articles, systematic reviews, scoping reviews, meta-  
13 analysis and rapid reviews, government and NGO reports and  
14 academic dissertations.
- 15 • Primary research focusing on MT in Low and Medium Income  
16 Countries(LMICs) and whose conclusions and discussion demonstrate  
17 transferable findings to African settings.
- 18 • All study designs will be considered including qualitative, quantitative  
19 and mixed methods studies.
- 20 • Studies focusing on health care provision through specified bi- or  
21 multilateral government agreements in Africa.
- 22
- 23
- 24
- 25
- 26
- 27
- 28
- 29
- 30
- 31
- 32
- 33

34 Exclusion criteria:  
35

- 36 • Evidence focusing on MT outside Africa and whose results are non-  
37 transferable to African settings, because the cultures and nature of MT  
38 may be substantially different from our target group.
- 39 • Evidence focusing on people forced to seek emergency medical care in  
40 conflict or post-conflict settings as opposed to organised medical travel  
41 in non-conflict settings.
- 42 • Evidence with focus on emergency medical care for conventional  
43 tourists.
- 44 • Evidence where medical care provision to medical tourists is not  
45 explicitly differentiated from the day to day provision of health care  
46 offered to the general public.
- 47 • Evidence with main focus on wellness tourism
- 48
- 49
- 50
- 51
- 52
- 53
- 54
- 55
- 56
- 57
- 58
- 59
- 60

## **Charting the Evidence (Data Abstraction)**

After title and abstract screening, successful candidate citations will be exported to Endnote bibliographic dataset for subsequent full text review. Endnote library application will be utilized to discard any duplicates. A data abstraction spreadsheet will be developed collectively by the reviewers to extract pre-determined variables and themes. Structuring this spreadsheet database will involve selecting and defining data categories and subcategories, as advised by the MT conceptual framework [26]. It will be secured online so that involved reviewers will have access and can make updates freely.

Bibliographic details, study design, number of participants, intervention(s), comparison(s), study setting, funding source and conclusions for the primary and secondary outcomes of interest will be extracted. This dataset will be populated from each selected paper. This step will be done iteratively as more familiarity of literature is gained and revisions done as appropriate. The data extraction form is attached as Appendix I.

## **Risk of bias (quality) assessment of individual studies**

Methodological quality of quantitative, qualitative and mixed methods primary studies will be assessed using the Mixed Methods Appraisal Tool (MMAT) [31]. Studies will not be excluded on account of low quality scores, but quality scores will be reported and considered in the narrative synthesis of the evidence.

## **Collating, Summarizing, and Reporting the Data**

The extracted data will be summarized and presented. This is in line with the purpose of a scoping review which is geared towards establishing the scope

1  
2  
3 of the current evidence, summarizing the results as presented across  
4 articles, and not synthesizing or distilling specific results [27, 28, 32]. The  
5 data will be analysed accordingly to address the main aim and the four  
6 specific study questions. Further to this, the study team will scrutinize the  
7 meanings of the findings as they relate to overall purpose of the study,  
8 discuss the implications for future research, practice and policy.  
9

10 Data analysis will employ both quantitative and qualitative methods.  
11

12 After the coding and validation of the spreadsheet file, the data will be  
13 exported into STATA 13 for analysis. Descriptive statistics will be used to  
14 summarize the data. Frequencies and percentages will be used to describe  
15 nominal data. A basic statistical account of the amount, type, and  
16 distribution of the studies included in the review will be presented.  
17

18 Also, a thematic analysis and concept map of the results will be presented.  
19 Thematic analysis will be carried out collectively by researchers using  
20 NVIVO.  
21

22 This analysis will generally answer questions like: how large is the literature  
23 on MT in Africa (number of papers), when was it published (age), where was  
24 the research conducted (geographic distribution), at what scale, and by  
25 whom (geographic/institution); where, when, and by whom research was  
26 published; the geographical spread of the research; types of methods used;  
27 types of subjects examined; types of variables measured; different  
28 disciplines assessing the topic; and patterns found in research results. We  
29 will use statistical means to produce tables and charts that depict cross-  
30 tabulations like: MT in Africa as it relates to study designs used, type of  
31 treatments, medical facilities, and selected patient characteristics (such as  
32 age, sex, geography, ethnicity).  
33

## 34 **Ethics and dissemination**

35  
36  
37  
38  
39  
40  
41  
42  
43  
44  
45  
46  
47  
48  
49  
50  
51  
52  
53  
54

1  
2  
3 The protocol for the systematic review has also been registered in  
4 PROSPERO (**Regn. No: RD42016039745**, <http://www.crd.york.ac.uk/PROSPERO> ).  
5  
6

7 The results will be disseminated by publication in peer-reviewed journal and  
8 presented at a relevant conference.  
9  
10

## 11 **Discussion**

12  
13

14 Medical tourism is different from medical care administered to conventional  
15 tourists in need of emergency medical care. Unlike the latter, the former  
16 specifically refers to 'foreign patients' who travel abroad for the express  
17 purpose of obtaining medical care [21]. Medical tourism is defined as a set  
18 of socioeconomic activities carried out either by or for medical tourists [33].  
19 The activities carried out by medical tourists correspond to the travel of  
20 patients in search of health services outside the jurisdiction of their home  
21 health systems [26], while those carried out for them correspond to  
22 attempts on the part of destinations to attract international patients by  
23 promoting their health care services and facilities [26]. Although there is no  
24 standard meaning that is assigned to it, the term "tourism" could refer to  
25 the measures taken by destination countries (supply side) to attract and  
26 meet the needs of international patients. The term could also refer to the  
27 tourism channels the medical tourist utilizes to get to the destination  
28 countries. Medical tourism therefore, is not more about tourism as it is  
29 about medical care provided to able-to-pay patients from abroad.  
30  
31  
32  
33  
34  
35  
36  
37  
38  
39  
40  
41  
42  
43  
44

45 In light of the above, therefore, evidence with focus on emergency medical  
46 care for conventional tourists will be excluded, as well as evidence where  
47 medical care provision to medical tourists is not explicitly differentiated from  
48 provision to the general public.  
49  
50  
51  
52

53 This study will include literature on formal bi- and multilateral medical care  
54 agreements that enable patients to be attended to in other countries, but  
55 exclude those papers that focus on 'forced' cross-border medical care,  
56  
57  
58  
59  
60

1  
2  
3 especially if public health facilities of destination countries are 'forced' to  
4 provide the care on humanitarian grounds. This condition exists especially in  
5 conflict and post-conflict zones.  
6  
7  
8

9  
10 Evidence focusing on MT outside Africa will be excluded because the cultures  
11 and nature of MT may be substantially different from this study's target  
12 group, unless their findings and conclusions have significant link to African  
13 settings.  
14  
15  
16

17  
18 Africa presents exceptionally unique and fascinating context in which to  
19 situate this MT study. This is because of the stark contrast in the African  
20 health care landscape: whereas medical tourism demands highly specialized  
21 medics, capable of executing most complicated surgeries, clad in advanced  
22 medical technologies and luxury, specialized hospitals, Africa, on the other  
23 hand, has a large local populations enduring rudimentary health, insufficient  
24 clean water and inadequate sanitation.  
25  
26  
27  
28  
29  
30

31  
32 To our knowledge, this is the first systematic scoping review that attempts  
33 to expound on the role, structure and effect of MT in Africa. Most MT  
34 evidence in Africa is emergent and multi-disciplinary in nature, hence the  
35 critical necessity of a scoping review in mapping the range of available  
36 evidence and systematically identify research gaps to more clearly illumine  
37 the role, structure and effect of MT in Africa.  
38  
39  
40  
41  
42

43  
44 It is anticipated that while findings from this study will lead to clearer  
45 understanding of MT in Africa, they will also contribute to the resolving of  
46 paradoxical healthcare issues on MT in the African context. For instance,  
47 reproductive tourism utilizes expensive and uncommon medical expertise to  
48 bring new children into this world [34, 35], yet yearly, malaria, pneumonia  
49 and other preventable infections kill millions of under-fives in Africa[14, 15].  
50  
51  
52  
53  
54

55  
56 MT is promoted as a solution to healthcare queues in other parts of the  
57 globe [1, 10, 11, 19, 20, 36]. Wealthy patients opt to fly into Africa to avoid  
58  
59  
60

1  
2  
3 these long queues in order to get faster service. But, in sharp contrast, local  
4 patients are forced to experience similar long queues in overly over-  
5 subscribed and underfunded local public health systems [15, 17, 19, 37-39].  
6  
7

8  
9 Globally, MT is growing at a high rate, including in Africa [10, 40, 41]. This  
10 growth, however, seems to be based solely on MT advantages to medical  
11 tourists, destination countries and healthcare providers. Medical tourists  
12 benefit from preferential treatment, based on their ability to pay for medical  
13 services [26]. Destination countries benefit in revenue generation [6, 9, 10].  
14 A bigger patient pool translates to higher profits for healthcare providers.  
15

16  
17 Motivated by these benefits, many African countries are competing for the  
18 global medical tourism dollar [12]. Unfortunately, MT in most of these  
19 countries is based on unsustainable, haphazard regulatory frameworks [42].  
20

21  
22 Given its potential contextual significance, it is imperative that a scientific  
23 reconnaissance study be carried out on MT in Africa. This scoping study is,  
24 therefore, an attempt to do this by providing more information about MT in  
25 Africa to policy makers, healthcare providers, potential patients and future  
26 researchers, hoping to contribute to improved healthcare systems in Africa.  
27

## 28 29 30 31 32 33 34 35 36 37 38 39 40 **Acknowledgements**

41  
42 We would like to thank the College of Health Sciences, University of  
43 KwaZulu-Natal for providing support in carrying out this study. Furthermore,  
44 we would like to thank Duke Magwaza, UKZN librarian, for his support in  
45 database search strategy.  
46  
47  
48

## 49 50 **Footnotes**

51  
52 Contributors: JJOM and JMTG conceptualised, JJOM and TPMT designed the  
53 study. LMM and JJOM prepared the draft of the research proposal. JMTG and  
54 JJOM developed the background. JJOM and TPMT contributed to developing  
55  
56  
57  
58  
59  
60

1  
2  
3 methods relating to review and synthesis of data. All authors planned the  
4 output of the review. All authors reviewed draft versions of the manuscript  
5 and approved the final version of the manuscript.  
6  
7  
8

9  
10 **Competing interests:** Authors declare no competing interests.

11  
12 **Funding:** This research received no specific grant from any funding agency  
13 in the public, commercial or not-for-profit sectors  
14  
15  
16  
17  
18  
19  
20  
21

## 22 References

- 23 1. Alsharif, M.J., R. Labonté, and Z. Lu, *Patients beyond borders: A study of medical tourists in four*  
24 *countries*. *Global Social Policy*, 2010. **10**(3): p. 315-335.
- 25 2. Reddy, S.G., *Medical tourism in India: an exploratory study*. 2013, Kansas State University.
- 26 3. Hall, C.M. and C.M. Hall, *Health and medical tourism: a kill or cure for global public health?*  
27 *Tourism review*, 2011. **66**(1/2): p. 4-15.
- 28 4. Johnston, R., et al., *What is known about the effects of medical tourism in destination and*  
29 *departure countries? A scoping review*. *International Journal for Equity in Health*, 2010. **9**(1): p.  
30 24.
- 31 5. Turner, L.G., *Quality in health care and globalization of health services: accreditation and*  
32 *regulatory oversight of medical tourism companies*. *International Journal for Quality in Health*  
33 *Care*, 2010: p. mzq078.
- 34 6. Christie, I., et al., *Tourism in Africa: Harnessing tourism for growth and improved livelihoods*.  
35 2014: World Bank Publications.
- 36 7. Rogerson 1, C.M., *Reviewing Africa in the global tourism economy*. *Development Southern*  
37 *Africa*, 2007. **24**(3): p. 361-379.
- 38 8. Turner, L., *'First world health care at third world prices': globalization, bioethics and medical*  
39 *tourism*. *BioSocieties*, 2007. **2**(03): p. 303-325.
- 40 9. Kachipande, S., *Medical Tourism in Africa: Sun, Sea, Scalpel and Safari*. 2013, Consultancy Africa  
41 Intelligence, Johannesburg, SA.
- 42 10. Bookman, M.Z. and K.R. Bookman, *Medical Tourism in Developing Countries*. 2007, 175 Fifth  
43 Avenue, New York, N.Y. 10010 PALGRAVE MACMILLAN.
- 44 11. Crush, J., et al., *South-South and North-South medical tourism: the case of South Africa*.  
45 *Travelling well: Essays in medical tourism*. Ottawa: Institute of Population Health, University of  
46 Ottawa, 2013: p. 43-61.
- 47 12. Maaka, T.P., *The role of medical tourism in 21st century Africa health system*. *African*  
48 *Renaissance*, 2006. **3**(4): p. 99-110.
- 49 13. Crush, J. and A. Chikanda, *South-South medical tourism and the quest for health in Southern*  
50 *Africa*. *Social Science & Medicine*, 2015. **124**: p. 313-320.
- 51 14. Cooke, J.G., *Public Health in Africa-A Report of the CSIS Global Health Policy Center*. *Journal of*  
52 *Public Health in Africa*, 2010. **1**(1).  
53  
54  
55  
56  
57  
58  
59  
60



- 1  
2  
3  
4  
5  
6  
7  
8  
9  
10  
11  
12  
13  
14  
15  
16  
17  
18  
19  
20  
21  
22  
23  
24  
25  
26  
27  
28  
29  
30  
31  
32  
33  
34  
35  
36  
37  
38  
39  
40  
41  
42  
43  
44  
45  
46  
47  
48  
49  
50  
51  
52  
53  
54  
55  
56  
57  
58  
59  
60
15. Kaseje, D., *Health care in Africa: Challenges, opportunities and an emerging model for improvement*. 2006.
  16. Asongu, S.A., *The impact of health worker migration on development dynamics: evidence of wealth effects from Africa*. The European Journal of Health Economics, 2014. **15**(2): p. 187-201.
  17. Clemens, M.A. and G. Pettersson, *New data on African health professionals abroad*. Human Resources for Health, 2008. **6**(1): p. 1-11.
  18. Webster, P., *Healthcare labour market in the emerging market economies: A literature review* Manisha Nair.
  19. Ahwireng-Obeng, F. and C. van Loggerenberg, *Africa's middle class women bring entrepreneurial opportunities in breast care medical tourism to South Africa*. The International journal of health planning and management, 2011. **26**(1): p. 39-55.
  20. Connell, J., *Contemporary medical tourism: Conceptualisation, culture and commodification*. Tourism Management, 2013. **34**: p. 1-13.
  21. Lunt, N., M. Hardey, and R. Mannion, *Nip, tuck and click: medical tourism and the emergence of web-based health information*. The Open Medical Informatics Journal, 2010. **4**(1).
  22. Pocock, N.S. and K.H. Phua, *Medical tourism and policy implications for health systems: a conceptual framework from a comparative study of Thailand, Singapore and Malaysia*. Globalization and health, 2011. **7**(1): p. 1.
  23. Abdullahel, H., *Globalization, medical tourism and health equity*, in *Symposium on Implications of Medical Tourism for Canadian Health and Health Policy*. 2009: Ottawa, Canada.
  24. Crooks, V.A., et al., *What is known about the patient's experience of medical tourism? A scoping review*. BMC Health Services Research, 2010. **10**(1): p. 1.
  25. Runnels, V., et al., *12 Conclusions: Medical Tourism Today and Tomorrow*, in *Transdisciplinary Studies in Population Health Series*. p. Chapt 12.
  26. Heung, V.C., D. Kucukusta, and H. Song, *A conceptual model of medical tourism: Implications for future research*. Journal of Travel & Tourism Marketing, 2010. **27**(3): p. 236-251.
  27. H., A. and O.M. L., *Scoping Studies: Towards a Methodological Framework*. International Journal of Social Research Methodology, 2005. **8**(1): p. pp 19 - 32.
  28. Levac, D., H. Colquhoun, and K.K. O'Brien, *Scoping studies: advancing the methodology*. Implement Sci, 2010. **5**(1): p. 1-9.
  29. McHugh, M.L., *Interrater reliability: the kappa statistic*. Biochemia medica, 2012. **22**(3): p. 276-282.
  30. Moher, D., et al., *Reprint—preferred reporting items for systematic reviews and meta-analyses: the PRISMA statement*. Physical therapy, 2009. **89**(9): p. 873-880.
  31. Pluye, P., et al., *Proposal: A mixed methods appraisal tool for systematic mixed studies reviews*. 2011, <http://www.webcitation.org/5tTRTc9yJ>: <http://mixedmethodsappraisaltoolpublic.pbworks.com>.
  32. Pham, M.T., et al., *A scoping review of scoping reviews: advancing the approach and enhancing the consistency*. Research synthesis methods, 2014. **5**(4): p. 371-385.
  33. Han, X. and B. Fang, *MEASURING THE SIZE OF TOURISM AND ITS IMPACT IN AN ECONOMY*. Statistical Journal of the UN Economic Commission for Europe, 1997. **14**(4): p. 357.
  34. Productions, D.L. <http://www.southafrica.net/za/en/articles/entry/article-southafrica.net-fertility-treatments>. 2016.
  35. Team, S.F.L.W., *High Court considers South African surrogate*, in *Family Law Newswire*. June 22, 2015, <http://www.marilynstowe.co.uk/2015/06/22/high-court-considers-south-african->

- 1  
2  
3  
4  
5  
6  
7  
8  
9  
10  
11  
12  
13  
14  
15  
16  
17  
18  
19  
20  
21  
22  
23  
24  
25  
26  
27  
28  
29  
30  
31  
32  
33  
34  
35  
36  
37  
38  
39  
40  
41  
42  
43  
44  
45  
46  
47  
48  
49  
50  
51  
52  
53  
54  
55  
56  
57  
58  
59  
60
- [surrogate/:](http://www.marilynstowe.co.uk/2015/06/22/high-court-considers-south-african-surrogate/) <http://www.marilynstowe.co.uk/2015/06/22/high-court-considers-south-african-surrogate/>.
36. Caballero-Danell, S. and C. Mugomba, *Medical tourism and its entrepreneurial opportunities: A conceptual framework for entry into the industry*. 2007.
37. Africa, K., *THE STATE OF HEALTHCARE IN AFRICA*. 2012, KPMG: South Africa.
38. Ajayi, I. and I. Adewole, *Breast and cervical cancer screening activities among family physicians in Nigeria*. *African journal of medicine and medical sciences*, 2002. **31**(4): p. 305-309.
39. Akukwe, C., *Healthcare delivery in Africa: issues, choices, challenges and opportunities*. *African Renaissance*, 2006. **3**(4).
40. George, R., *Medical tourism: surgeon & safari*. *South African travel and tourism cases*, 2004: p. 241-243.
41. Herrick, D.M., *Medical tourism: Global competition in health care*. *National Center for Policy Analysis*, 2007. **1**.
42. Mahomed, S. and M.N. Slabbert, *Stem cell tourism in South Africa: The legal position*. *South African Journal of Bioethics and Law*, 2012. **5**(2): p. 69-73.

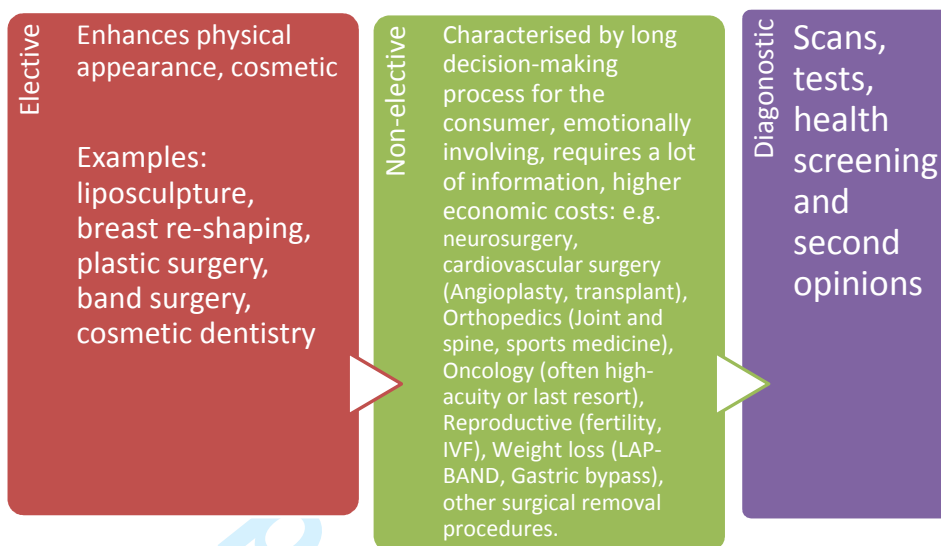

peer review only

1  
2  
3  
4  
5  
6  
7  
8  
9  
10  
11  
12  
13  
14  
15  
16  
17  
18  
19  
20  
21  
22  
23  
24  
25  
26  
27  
28  
29  
30  
31  
32  
33  
34  
35  
36  
37  
38  
39  
40  
41  
42  
43  
44  
45  
46  
47  
48  
49  
50  
51  
52  
53  
54  
55  
56  
57  
58  
59  
60

1  
2  
3  
4  
5  
6  
7  
8  
9  
10  
11  
12  
13  
14  
15  
16  
17  
18  
19  
20  
21  
22  
23  
24  
25  
26  
27  
28  
29  
30  
31  
32  
33  
34  
35  
36  
37  
38  
39  
40  
41  
42  
43  
44  
45  
46  
47  
48  
49  
50  
51  
52  
53  
54  
55  
56  
57  
58  
59  
60

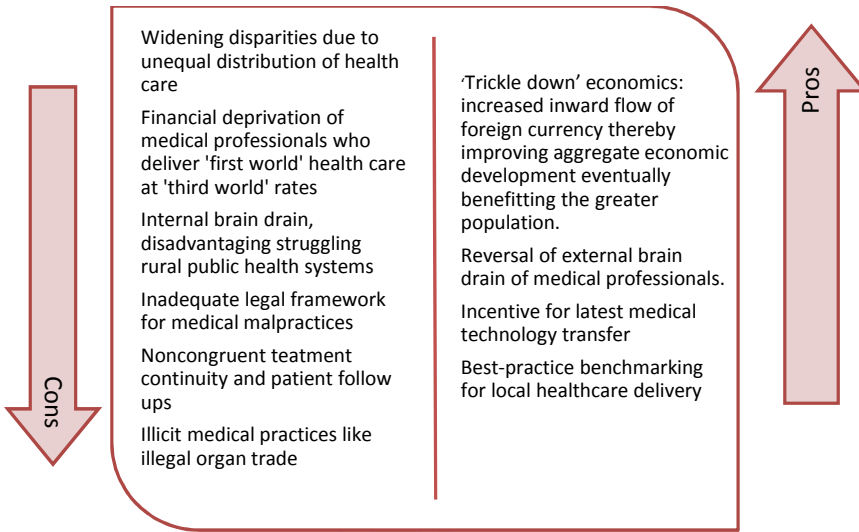

Peer review only

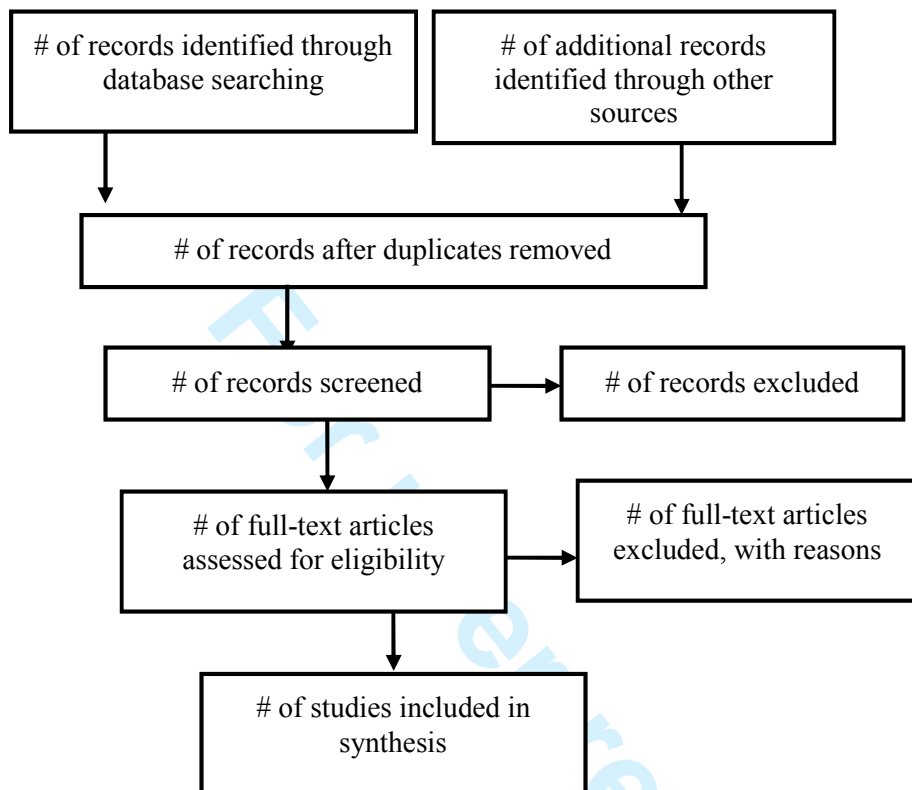

## Appendix I

"The Role, Process and Effect of Medical tourism in Africa: A Systematic Scoping Review"

### Data Extraction Instrument

|   |                                 | Document ID: |
|---|---------------------------------|--------------|
| 1 | Reviewer/Person extracting data |              |
| 2 | Date of Data Extraction         |              |
| 3 | Author, Year, Publication Type  |              |
| 4 | Journal/Publisher               |              |
| 5 | Title, full citation            |              |
| 6 | Funding Source (If Applicable)  |              |
| 7 | Target Participant(s)           |              |

|    |                      |   |                                                                                          |
|----|----------------------|---|------------------------------------------------------------------------------------------|
| 8  | Methodology          |   |                                                                                          |
| 9  | Method               |   |                                                                                          |
| 10 | Aims of study        |   |                                                                                          |
| 11 | Setting              |   |                                                                                          |
| 12 | Geographical Context |   |                                                                                          |
| 13 |                      |   |                                                                                          |
| 14 | Relevant Findings on | a | MT Advertising and Distribution Channels(Agencies, Hospital reps, Internet, other media) |
|    |                      | b | MT Regulatory Conditions                                                                 |
|    |                      | c | Ethical Issues                                                                           |
|    |                      | d | Hospital/Physician Specialty                                                             |
|    |                      | e | Hosp./Physician                                                                          |

|   |          |   |                                                                                                  |  |
|---|----------|---|--------------------------------------------------------------------------------------------------|--|
|   |          |   | Accreditation                                                                                    |  |
|   |          | f | Medical Service and Procedure Prices                                                             |  |
|   |          | g | Main MT Actors                                                                                   |  |
|   |          | h | Infrastructure /Superstructure (Hospitals, Clinics, Private Participation, Public Participation) |  |
|   |          | i | MT Promotion                                                                                     |  |
|   |          |   | Any MT Benefits, Costs, Prospects or Challenges identified                                       |  |
|   |          | j | MT Product Differentiation (Add-ons, Language used)                                              |  |
| 1 | Reviewer |   |                                                                                                  |  |
| 5 | Comments |   |                                                                                                  |  |

**Notes:**

**Methodology:** Theoretical underpinnings of the research; also whether the nature of the research is sociological, medical, legal etc

**Method:** How the data was collected; data collection tools.

**Setting:** Seeks to identify cultural features such as employment, lifestyle, ethnicity, age, gender, socio-economic class, location and time.

1  
2  
3  
4 **Participants:** Information related to the inclusion and exclusion (Sampling)  
5 criteria of the research, includes descriptions of age, gender, number of  
6 included subjects, ethnicity, level of functionality, and cultural background, if  
7 available.  
8  
9

10  
11 **Promotion:** Includes Promotional Strategies by Local/National  
12 Governments, Hospital Boards, Tourism Boards; Special Task Force  
13 Committees; Overseas Promotion; National Campaigns and Quality  
14 (Accreditation, Certification).  
15  
16  
17  
18  
19  
20  
21  
22  
23  
24  
25  
26  
27  
28  
29  
30  
31  
32  
33  
34  
35  
36  
37  
38  
39  
40  
41  
42  
43  
44  
45  
46  
47  
48  
49  
50  
51  
52  
53  
54  
55  
56  
57  
58  
59  
60



# BMJ Open

## The Role, Structure and Effect of Medical Tourism in Africa: A Systematic Scoping Review Protocol

|                                 |                                                                                                                                                                                                                                                                                                                                                                                                                           |
|---------------------------------|---------------------------------------------------------------------------------------------------------------------------------------------------------------------------------------------------------------------------------------------------------------------------------------------------------------------------------------------------------------------------------------------------------------------------|
| Journal:                        | <i>BMJ Open</i>                                                                                                                                                                                                                                                                                                                                                                                                           |
| Manuscript ID                   | bmjopen-2016-013021.R1                                                                                                                                                                                                                                                                                                                                                                                                    |
| Article Type:                   | Protocol                                                                                                                                                                                                                                                                                                                                                                                                                  |
| Date Submitted by the Author:   | 02-Aug-2016                                                                                                                                                                                                                                                                                                                                                                                                               |
| Complete List of Authors:       | Mogaka, John; University of KwaZulu-Natal College of Health Sciences, Discipline of Public Health Medicine<br>Tsoka-Gwegweni, Joyce; University of KwaZulu-Natal College of Health Sciences, Discipline of Public Health Medicine<br>Mupara, Lucia; University of KwaZulu-Natal College of Health Sciences, Discipline of Public Health Medicine<br>Mashamba-Thompson, Tivani; University of KwaZulu Natal, Public Health |
| <b>Primary Subject Heading</b>: | Global health                                                                                                                                                                                                                                                                                                                                                                                                             |
| Secondary Subject Heading:      | Health services research, Health policy, Health economics, Public health, Research methods                                                                                                                                                                                                                                                                                                                                |
| Keywords:                       | Health economics < HEALTH SERVICES ADMINISTRATION & MANAGEMENT, Health policy < HEALTH SERVICES ADMINISTRATION & MANAGEMENT, MEDICAL ETHICS, PUBLIC HEALTH, SOCIAL MEDICINE, International health services < HEALTH SERVICES ADMINISTRATION & MANAGEMENT                                                                                                                                                                  |
|                                 |                                                                                                                                                                                                                                                                                                                                                                                                                           |

SCHOLARONE™  
Manuscripts

only

# The Role, Structure and Effects of Medical Tourism in Africa: A Systematic Scoping Review Protocol

John J O Mogaka<sup>a</sup>

Joyce M Tsoka-Gwegweni<sup>1,a</sup>

Lucia M Mupara<sup>a</sup>

Tivani Mashamba-Thompson<sup>a</sup>

---

<sup>a</sup> Discipline of Public Health Medicine,  
School of Nursing and Public Health,  
University of KwaZulu Natal,  
Durban, South Africa

<sup>1</sup> Correspondence should be addressed to  
Prof. Joyce M Tsoka-Gwegweni  
Discipline of Public Health Medicine,  
School of Nursing and Public Health,  
University of KwaZulu Natal,  
Howard College Campus,  
Mazisi Kunene Avenue,  
Durban, 4041, South Africa  
Tel: +27 31 2604383/4386  
Fax: +27 31 260 4211  
Email address: [Tsokagwegweni@ukzn.ac.za](mailto:Tsokagwegweni@ukzn.ac.za)

## Abstract

**Introduction:** Africa both sends and receives patients who travel abroad to consume health care services, through a growing global phenomenon referred to as medical or health tourism. Evidence suggest that, if resources generated through medical tourism are even-handedly used in strengthening local healthcare systems, medical tourism can significantly impact health care provision in Africa. Currently, however, the understanding of this important component of health care in Africa is inadequate. This study seeks to determine the level of knowledge on the role, structure and effect of medical tourism in Africa as it relates to healthcare systems in the region.

**Methods:** We will conduct a systematic scoping review to outline the role, structure and effect of medical tourism in Africa. Databases: Academic Search Complete, Business Source Complete, PsycARTICLES (EBSCO), PsycINFO (EBSCO). Studies will be mapped in two stages. Stage 1: Mapping the studies based on the relevance of their titles and subject descriptors. Stage 2: Applying further inclusion criteria on studies from stage 1. Two reviewers will independently assess study quality and abstract data. Both quantitative and qualitative data analysis will be performed, using STATA 13 and NVIVO respectively.

**Ethics and dissemination:** This protocol has been registered in PROSPERO (**Regn. No. CRD42016039745**) available at <http://www.crd.york.ac.uk/PROSPERO>. The study will be disseminated electronically and in print. It will also be presented at conferences related to medical tourism, public health, health systems strengthening, health care delivery and tourism.

**Discussion:** Medical tourism spurs cutting-edge medical technologies, techniques and best practices in healthcare delivery. While castigated for promoting healthcare inequity by some, medical tourism is likely to be a solution to many economical healthcare problems in Africa. By elucidating

1  
2  
3 the role, structure and effect of this phenomenon, this study will contribute  
4 to health systems strengthening in Africa.  
5  
6  
7  
8  
9

### 10 **Strengths and limitations of this study**

- 13 • This study offers a 'big picture' analysis of medical tourism (MT) in  
14 Africa by synthesizing vast amounts of literature on the subject.
- 15 • This scoping review offers an ideal platform for synthesizing literature  
16 on MT in Africa whose methodological approaches, settings, study  
17 populations and behaviours are wide-ranging.
- 18 • This approach of synthesising literature, however, presents a limitation  
19 in that a detailed analysis of case specific interventions and quality  
20 assessment of individual studies is not applicable.
- 21 • As the study will only include literature published in English, studies  
22 published in other languages will be omitted. However, research shows  
23 that almost 70% -90% of published works are in English [1]. This fact  
24 minimizes adverse effects of searching publications written only in  
25 English.
- 26 • To our knowledge there is paucity of scientific study on MT in Africa.  
27 While this may be a possible limitation in terms of the amount of data  
28 for this scoping review, it may be an important finding of this study  
29 and a basis for calling for more research in this area.  
30  
31  
32  
33  
34  
35  
36  
37  
38  
39  
40  
41  
42  
43  
44  
45

46  
47 **Keywords:** Global Health, Health services research, Healthcare systems,  
48 Medical tourism, Public Health  
49  
50  
51  
52  
53  
54  
55  
56  
57  
58  
59  
60

## Introduction

Africa is concurrently a source and destination of patients who form part of a global phenomenon referred to as health or medical tourism,[2-5] the practice of travelling abroad to consume health care that is either too delayed, unavailable, unaffordable or proscribed at their home countries[2, 6].

Medical tourism (MT) challenges the role played by traditional, nation-state-bound health systems. It affects the performance of the public health systems' core functions of assessment, policy development, and assurance with regard to the health of citizens within the state[7, 8].

On the one hand, MT affords patients individual solution to what is traditionally considered a government concern, health for its citizens[9], thereby creating more equitable options for individuals. The wealthy middle class in Africa, for instance, regularly seek advanced medical care abroad[10].

Conversely however, MT can indicate a breakdown of service delivery in home health systems. Patients may lack confidence in the ability of home systems to meet their medical needs and move abroad in relatively large numbers.[7, 11].

Whereas MT may pose potentially attractive economic benefits to most governments in Africa, it may particularly prove challenging to local health systems, whose officials maybe tasked with both its regulation domestically and promotion internationally, while at the same time grappling with risks such endeavours pose to the national health systems.[9].

Specialized medical services and procedures offered to medical tourists include elective, non-elective and diagnostic as depicted in Fig.1.

However, current availability, pricing and geo-distribution of these procedures and services in Africa is not well-known.

Medical tourism entails highly trained and experienced physicians, high-tech medical equipment and specialised ultramodern medical facilities. Some African countries are said to have invested in or attracted ample pool of

1  
2  
3  
4 specialist physicians in quality private hospitals whose medical facilities are  
5 similar to the ones in developed countries[10]. Costs associated with these  
6 MT infrastructure are substantial[12]. Similarly, MT is said to cause  
7 competition for best local resources including qualified medical professionals  
8 [12, 13] and transplant organs. The accrued benefits to the local host  
9 population, in turn, is however, not well-known.

10  
11  
12  
13  
14  
15 Many arguments have been advanced for and against MT in Africa. Fig.2  
16 [12] summarizes these advantages and disadvantages.

17  
18  
19  
20 The extent and dimension of these pros and cons in as far as healthcare  
21 systems in Africa are concerned, however, is inexact [3, 6, 9, 12, 14-17].  
22 The role and effects of MT in Africa needs to be investigated and  
23 documented in the face of Africa's two-tier healthcare systems, featuring a  
24 relatively efficient private and relatively overburdened public medical care  
25 sectors.

26  
27  
28  
29  
30  
31  
32  
33  
34  
35  
36  
37  
38  
39  
40  
41  
42  
43  
44  
45  
46  
47  
48  
49  
50  
51  
52  
53  
54  
55  
56  
57  
58  
59  
60  
MT services are generally provided by the private sector and payments are  
mostly out-of-pocket. Whereas private health care providers have little  
incentive to consider population-based services, the public at large must be  
served through public health interventions focused on the health needs of  
the entire population or population groups. Individual health care, population  
health and public policy decisions must, therefore, be premised on best  
available evidence to avoid poor and inappropriate interventions [4, 15, 17-  
20]. However, for MT in Africa, this is clearly difficult because of paucity of  
scientific evidence on the subject. Secondly, even with the available  
evidence, the information generated individually by the studies may be  
biased, methodologically flawed, time and context constrained, resulting in  
conflicting conclusions. This does not allow MT in Africa to be understood  
well[21]. Hence the necessity and justification for this scoping review, whose  
purpose is to assess current level of knowledge on MT in Africa with a

1  
2  
3 reference to Africa's healthcare systems, by systematically reviewing  
4 available literature on the subject. The study will focus on MT out of, into  
5 and intra-Africa flows.  
6  
7

8  
9 In this study, we take the geo-scheme for Africa approach used by the  
10 African Union and United Nations in dividing the region directionally[22]:  
11  
12

- 13  
14 • North Africa lies north of the Sahara and runs along the  
15 Mediterranean coast.
- 16  
17 • West Africa excludes Northern Africa and the Maghreb and includes the  
18 large portions of the Sahara Desert and the Adamawa Mountains.
- 19  
20 • East Africa stretches from the Horn of Africa to Mozambique, including  
21 Madagascar, Seychelles and Mauritius
- 22  
23 • Central Africa is the large mass at the center of Africa which either does  
24 not fall squarely into any other region or only partially does so.
- 25  
26 • Southern Africa consists of the portion generally south of -10° latitude  
27 and the great rainforests of Congo.  
28

29  
30  
31 The main aim of this study is to outline the role, structure and effect of  
32 medical tourism in Africa as it relates to Africa's healthcare systems by  
33 answering the following specific questions:  
34  
35

- 36 i. What is published about Africa's MT infrastructure: the availability,  
37 pricing and geo-distribution of specialized medical procedures and  
38 services offered to medical tourists in Africa?  
39
  - 40 ii. Who are the main medical tourism actors in Africa, as identified in the  
41 literature?  
42
  - 43 iii. What are the identified effects of medical tourism on healthcare  
44 systems in Africa?  
45
  - 46 iv. What are the identified ethical issues associated with medical tourism  
47 in Africa?  
48
- 49  
50  
51  
52

## 53 **Methods**

54  
55  
56  
57  
58  
59  
60

1  
2  
3 The study will employ Arksey and O'Malley scoping review framework as well  
4 as incorporate recent scoping review suggestions by Levac et al[23, 24].  
5  
6

## 7 **Identification of relevant studies**

### 8 a) Key terms

9  
10  
11 Multiple terms are used to refer to MT in literature. Evidence indicate that  
12 while literature on MT is generally growing, it is mostly focused either on  
13 individual case studies or specific aspects of MT [11].Therefore, an extensive  
14 list of primary and secondary search terms will be developed. Search terms  
15 will include: medical tourism, stem cell tourism, fertility tourism, dental  
16 tourism, health tourism and transplant tourism, among other terms with  
17 Africa as the bounding parameter. The university librarian will help in  
18 finalizing the keyword and search strategy in this study. Attempt will be  
19 made to obtain relevant documents that are not readily available through  
20 concerned authors or publishers.  
21  
22

### 23 b) Databases:

24 Academic databases: Academic Search Complete, Business Source  
25 Complete, PsycARTICLES (EBSCO), PsycINFO (EBSCO), Health Source -  
26 Consumer Edition, Health Source- Nursing/Academic Edition and sabinet.  
27

28 Search engines: Google and google scholar.  
29

30 Relevant MT industry associations, OECD, WHO, Worldbank and other  
31 multilateral organizations' websites will be used to search for government  
32 reports, practice guidelines and industry reports.  
33

34 Relevant research dissertations will be searched through worldcat via oclc,  
35 and reference list scanning of included studies.  
36

### 37 c) Search strategy:

38  
39 The databases selected will cover a broad range of disciplines to ensure  
40 sensitivity. Search queries will be tailored to specific requirements for each  
41 database. For academic databases, keywords will be combined using  
42  
43  
44  
45  
46  
47  
48  
49



Boolean operators (AND, OR, NOT). A snowball technique will be used to find related works.

However, since this will be an iterative process, the detailed search strategy will be documented in the analysis and write up of the full review.

Researchers will keep an updated record on dates and the numbers of publications identified during each session of literature search using a search records table[25] as shown below:

| Date | Keyword searched | Search engine used | Number of publications retrieved |
|------|------------------|--------------------|----------------------------------|
|      |                  |                    |                                  |

Table 1: Electronic search record(source: Adapted from Mashamba-Thomson T.P. et al [25])

### Study Selection (Screening)

A two-stage screening process will be used to assess the relevance of studies identified in the search. Two reviewers will independently evaluate and apply the identified selection criteria to the candidate literature titles and abstracts. Titles and abstracts will be screened as "include", "exclude" or "uncertain". Full text of articles screened as "uncertain" will be reviewed by the third reviewer for verification against the inclusion criteria. During the first stage, only the title and abstract of citations will be reviewed to preclude articles that do not meet the minimum inclusion criteria. A title and abstract relevance screening form will be developed and pretested on a convenience sample of 10 academic citations to evaluate reviewer agreement. A kappa calculation will be done based on the results of this pre-test. This will in turn be used to show the reviewers' inter-rater agreement level. Generally, a kappa score over 0.8 is considered a high level of agreement [26]. In accordance with recommendations by Levac et al.[24],

1  
2  
3 after reviewing every batch of 20 to 30 publications, the reviewers will meet  
4 to resolve any conflicts and ensure consistency with the research question  
5 and purpose.  
6  
7

8  
9  
10 Executive summaries in grey literature will be treated as abstracts. Relevant  
11 titles whose abstracts are not available will be taken to screening stage two  
12 for full review. During screening stage two, reviewers will independently  
13 screen the rest of the search results using the pre-defined inclusion-  
14 exclusion criteria. Any ensuing discrepancies will be resolved by discussion  
15 or the involvement of the third reviewer.  
16  
17

18  
19 To capture and present the screening process, the Preferred Reporting Items  
20 for Systematic and Meta- Analyses (PRISMA) flow diagram in Fig.3 [27] will  
21 be used.  
22  
23

#### 24 Inclusion criteria:

- 25 • Evidence published in English.
- 26 • There will be no publication date restrictions up to 06 June 2016.
- 27 • Literature with substantial focus on MT in Africa including: peer-  
28 reviewed journal articles, systematic reviews, scoping reviews, meta-  
29 analysis and rapid reviews, government and NGO reports and  
30 academic dissertations.

31  
32 Research focusing on MT in Low and Medium Income Countries(LMICs)  
33 and whose conclusions and discussion demonstrate transferable  
34 findings to African settings.  
35

- 36 • All study designs will be considered including qualitative, quantitative  
37 and mixed methods studies.
- 38 • Studies focusing on health care provision through specified bi- or  
39 multilateral government agreements in Africa.  
40  
41

#### 42 Exclusion criteria:

- Evidence focusing on MT outside Africa and whose results are non-transferable to African settings.
- Evidence focusing on people forced to seek emergency medical care in conflict or post-conflict settings as opposed to organised medical travel in non-conflict settings.
- Evidence with focus on emergency medical care for conventional tourists.
- Evidence where medical care provision to medical tourists is not explicitly differentiated from the day to day provision of health care offered to the general public.
- Evidence with main focus on wellness tourism

### **Charting the Evidence (Data Abstraction)**

After title and abstract screening, successful candidate citations will be exported to Endnote bibliographic dataset for subsequent full text review. Endnote library application will be utilized to discard any duplicates. A data abstraction spreadsheet will be developed collectively by the reviewers to extract pre-determined variables and themes. Structuring this spreadsheet database will involve selecting and defining data categories and subcategories, as advised by the MT conceptual framework [21]. It will be secured online so that involved reviewers will have access and can make updates freely.

Bibliographic details, study design, number of participants, intervention(s), comparison(s), study setting, funding source and conclusions for the primary and secondary outcomes of interest will be extracted. This dataset will be populated from each selected paper. This step will be done iteratively as more familiarity of literature is gained and revisions done as appropriate. The data extraction form is attached as Appendix I.

## **Risk of bias (quality) assessment of individual studies**

Methodological quality of quantitative, qualitative and mixed methods primary studies will be assessed using the Mixed Methods Appraisal Tool (MMAT) [28]. Studies will not be excluded on account of low quality scores, but quality scores will be reported and considered in the narrative synthesis of the evidence.

## **Collating, Summarizing, and Reporting the Data**

The extracted data will be summarized and presented. This is in line with the purpose of a scoping review which is geared towards establishing the scope of the current evidence, summarizing the results as presented across articles, and not synthesizing or distilling specific results [23, 24, 29]. The data will be analysed accordingly to address the main aim and the four specific study questions. Further to this, the study team will scrutinize the meanings of the findings as they relate to overall purpose of the study, discuss the implications for future research, practice and policy.

Data analysis will employ both quantitative and qualitative methods.

After the coding and validation of the spreadsheet file, the data will be exported into STATA 13 for analysis. Descriptive statistics will be used to summarize the data. Frequencies and percentages will be used to describe nominal data. A basic statistical account of the amount, type, and distribution of the studies included in the review will be presented.

Also, a thematic analysis and concept map of the results will be presented. Thematic analysis will be carried out using NVIVO research software.

This analysis will generally answer questions like: how large is the literature on MT in Africa (number of papers), when was it published (age), where was the research conducted (geographic distribution), at what scale, and by whom (geographic/institution); where, when, and by whom research was

1  
2  
3 published; the geographical spread of the research; types of methods used;  
4 types of subjects examined; types of variables measured; different  
5 disciplines assessing the topic; and patterns found in research results. We  
6 will use statistical means to produce tables and charts that depict cross-  
7 tabulations like: MT in Africa as it relates to study designs used, type of  
8 treatments, medical facilities, and selected patient characteristics (such as  
9 age, sex, geography, ethnicity).  
10  
11  
12  
13  
14  
15  
16

### 17 **Ethics and dissemination**

18  
19 The protocol for the systematic review has also been registered in  
20 PROSPERO (**Regn. No: RD42016039745**, <http://www.crd.york.ac.uk/PROSPERO>).  
21  
22 The results will be disseminated by publication in peer-reviewed journal and  
23 presented at a relevant conference.  
24  
25  
26  
27

### 28 **Discussion**

29  
30 Medical tourism is different from medical care administered to conventional  
31 tourists in need of emergency medical care. Unlike the latter, the former  
32 specifically refers to 'foreign patients' who travel abroad for the express  
33 purpose of obtaining medical care [17]. Medical tourism is defined as a set  
34 of socioeconomic activities carried out either by or for medical tourists [30].  
35 The activities carried out by medical tourists correspond to the travel of  
36 patients in search of health services outside the jurisdiction of their home  
37 health systems [21], while those carried out for them correspond to  
38 attempts on the part of destinations to attract international patients by  
39 promoting their health care services and facilities [21]. Although there is no  
40 standard meaning that is assigned to it, the term "tourism" could refer to  
41 the measures taken by destination countries (supply side) to attract and  
42 meet the needs of international patients. The term could also refer to the  
43 tourism channels the medical tourist utilizes to get to the destination  
44 countries.  
45  
46  
47  
48  
49  
50  
51  
52  
53  
54  
55  
56  
57  
58  
59  
60

1  
2  
3 In light of the above, therefore, evidence with focus on emergency medical  
4 care for conventional tourists will be excluded.  
5  
6

7  
8 This study will include literature on formal bi- and multilateral medical care  
9 agreements that enable patients to be attended to in other countries, but  
10 exclude those papers that focus on 'forced' cross-border medical care,  
11 especially if public health facilities of destination countries are 'forced' to  
12 provide the care on humanitarian grounds. This condition exists especially in  
13 conflict and post-conflict zones.  
14  
15  
16  
17  
18

19  
20 Evidence on MT that is global in outlook will be included in-as-far-as its  
21 findings are relevant to Africa and its healthcare systems. Relevance will be  
22 informed as progressive familiarity with literature is gained in this study.  
23  
24

25  
26 Africa presents exceptionally unique and fascinating context in which to  
27 situate this MT study. This is because of the stark contrast in the African  
28 health care landscape: whereas medical tourism demands highly specialized  
29 medics, capable of executing most complicated surgeries, clad in advanced  
30 medical technologies and luxury, specialized hospitals, Africa, on the other  
31 hand, has a large local populations enduring rudimentary health, insufficient  
32 clean water and inadequate sanitation.  
33  
34  
35  
36  
37  
38

39  
40 To our knowledge, this is the first systematic scoping review that attempts  
41 to expound on the role, structure and effect of MT as it relates to healthcare  
42 systems in Africa. Most MT evidence on Africa is emergent and multi-  
43 disciplinary in nature, hence the critical necessity of a scoping review to map  
44 the range of extant evidence and systematically identify research gaps to  
45 more clearly illumine the role, structure and effects of MT in Africa.  
46  
47  
48  
49  
50

51  
52 It is anticipated that while findings from this study will lead to clearer  
53 understanding of MT in Africa, they will also contribute to the resolving of  
54 paradoxical healthcare issues in the Africa. The needs of 'foreign' patients  
55 may be prioritized over those of locals, especially if economic incentives  
56  
57  
58  
59  
60

1  
2  
3  
4  
5  
6  
7  
8  
9  
10  
11  
12  
13  
14  
15  
16  
17  
18  
19  
20  
21  
22  
23  
24  
25  
26  
27  
28  
29  
30  
31  
32  
33  
34  
35  
36  
37  
38  
39  
40  
41  
42  
43  
44  
45  
46  
47  
48  
49  
50  
51  
52  
53  
54  
55  
56  
57  
58  
59  
60

overweigh public health considerations, thereby unfairly shifting resources towards the development of more expensive clinical interventions that cater for exclusive few, while promoting healthcare inequity [7, 9, 31]. For instance, reproductive tourism utilizes expensive and uncommon medical expertise to bring new children into this world [32, 33], yet yearly, malaria, pneumonia and other preventable infections kill millions of under-fives in Africa[34, 35].

MT is promoted as a solution to healthcare queues in some parts of the world [2, 10, 12, 14, 16, 36]. Able-to-pay patients opt to fly into Africa to avoid these long queues in order to get faster service. But, in sharp contrast, local patients are forced to experience similar long queues in overly over-subscribed and underfunded local health systems [10, 35, 37-40].

Globally, MT is growing at a high rate, including in Africa [12, 41, 42]. This growth, however, seems to be based solely on MT advantages to medical tourists, destination countries and healthcare providers. Medical tourists benefit from preferential treatment, based on their ability to pay for medical services [21]. Destination countries benefit in revenue generation [12, 43, 44].

Motivated by these benefits, many African countries are competing for the global medical tourism dollar [45-48]. Unfortunately, MT in most of these countries is based on unsustainable, haphazard regulatory frameworks [49].

Given its potential contextual significance, it is imperative that a scientific reconnaissance study be carried out on MT in Africa. This scoping study is, therefore, an attempt to do this by providing more information about MT in Africa to policy makers, healthcare providers, potential patients and future researchers, hoping to contribute to improved healthcare systems in Africa.

## Acknowledgements

We would like to thank the College of Health Sciences, University of KwaZulu-Natal for providing support in carrying out this study. Furthermore, we would like to thank Duke Magwaza, UKZN librarian, for his support in database search strategy.

## Footnotes

Contributors: JJOM and JMTG conceptualised, JJOM and TPMT designed the study. LMM and JJOM prepared the draft of the research proposal. JMTG and JJOM developed the background. JJOM and TPMT contributed to developing methods relating to review and synthesis of data. All authors planned the output of the review. All authors reviewed draft versions of the manuscript and approved the final version of the manuscript.

**Competing interests:** Authors declare no competing interests.

**Funding:** This research received no specific grant from any funding agency in the public, commercial or not-for-profit sectors

## References

1. Pickering, C. and J. Byrne, *The benefits of publishing systematic quantitative literature reviews for PhD candidates and other early-career researchers*. Higher Education Research & Development, 2014. **33**(3): p. 534-548.
2. Alsharif, M.J., R. Labonté, and Z. Lu, *Patients beyond borders: A study of medical tourists in four countries*. Global Social Policy, 2010. **10**(3): p. 315-335.
3. Hall, C.M. and C.M. Hall, *Health and medical tourism: a kill or cure for global public health?* Tourism review, 2011. **66**(1/2): p. 4-15.
4. Johnston, R., et al., *What is known about the effects of medical tourism in destination and departure countries? A scoping review*. International Journal for Equity in Health, 2010. **9**(1): p. 24.
5. Turner, L.G., *Quality in health care and globalization of health services: accreditation and regulatory oversight of medical tourism companies*. International Journal for Quality in Health Care, 2010: p. mzzq078.
6. Reddy, S.G., *Medical tourism in India: an exploratory study*. 2013, Kansas State University.
7. Dominique, M. *Medical Tourism and Cross-border Care*. 2013.



- 1  
2  
3  
4  
5  
6  
7  
8  
9  
10  
11  
12  
13  
14  
15  
16  
17  
18  
19  
20  
21  
22  
23  
24  
25  
26  
27  
28  
29  
30  
31  
32  
33  
34  
35  
36  
37  
38  
39  
40  
41  
42  
43  
44  
45  
46  
47  
48  
49  
50  
51  
52  
53  
54  
55  
56  
57  
58  
59  
60
8. Handler, A., M. Issel, and B. Turnock, *A conceptual framework to measure performance of the public health system*. American Journal of Public Health, 2001. **91**(8): p. 1235-1239.
  9. Pocock, N.S. and K.H. Phua, *Medical tourism and policy implications for health systems: a conceptual framework from a comparative study of Thailand, Singapore and Malaysia*. Globalization and health, 2011. **7**(1): p. 1.
  10. Ahwireng-Obeng, F. and C. van Loggerenberg, *Africa's middle class women bring entrepreneurial opportunities in breast care medical tourism to South Africa*. The International journal of health planning and management, 2011. **26**(1): p. 39-55.
  11. Hanefeld, J., et al., *Why do medical tourists travel to where they do? The role of networks in determining medical travel*. Social Science & Medicine, 2015. **124**: p. 356-363.
  12. Bookman, M.Z. and K.R. Bookman, *Medical Tourism in Developing Countries*. 2007, 175 Fifth Avenue, New York, N.Y. 10010 PALGRAVE MACMILLAN.
  13. Turner, L., *'First world health care at third world prices': globalization, bioethics and medical tourism*. BioSocieties, 2007. **2**(03): p. 303-325.
  14. Connell, J., *Contemporary medical tourism: Conceptualisation, culture and commodification*. Tourism Management, 2013. **34**: p. 1-13.
  15. Crush, J. and A. Chikanda, *South-South medical tourism and the quest for health in Southern Africa*. Social Science & Medicine, 2015. **124**: p. 313-320.
  16. Crush, J., et al., *South-South and North-South medical tourism: the case of South Africa*. Travelling well: Essays in medical tourism. Ottawa: Institute of Population Health, University of Ottawa, 2013: p. 43-61.
  17. Lunt, N., M. Hardey, and R. Mannion, *Nip, tuck and click: medical tourism and the emergence of web-based health information*. The Open Medical Informatics Journal, 2010. **4**(1).
  18. Abdullahel, H., *Globalization, medical tourism and health equity*, in *Symposium on Implications of Medical Tourism for Canadian Health and Health Policy*. 2009: Ottawa, Canada.
  19. Crooks, V.A., et al., *What is known about the patient's experience of medical tourism? A scoping review*. BMC Health Services Research, 2010. **10**(1): p. 1.
  20. Runnels, V., et al., *12 Conclusions: Medical Tourism Today and Tomorrow*, in *Transdisciplinary Studies in Population Health Series*. p. Chapt 12.
  21. Heung, V.C., D. Kucukusta, and H. Song, *A conceptual model of medical tourism: Implications for future research*. Journal of Travel & Tourism Marketing, 2010. **27**(3): p. 236-251.
  22. Division, U.N.S. *Standard Country and Area Codes Classifications (M49)*. 2016 [cited 2016 26 July]; Available from: <http://unstats.un.org/unsd/methods/m49/m49regin.htm>.
  23. H., A. and O.M. L., *Scoping Studies: Towards a Methodological Framework*. International Journal of Social Research Methodology, 2005. **8**(1): p. pp 19 - 32.
  24. Levac, D., H. Colquhoun, and K.K. O'Brien, *Scoping studies: advancing the methodology*. Implement Sci, 2010. **5**(1): p. 1-9.
  25. Mashamba-Thompson, T., et al., *Impact of point-of-care diagnostics on maternal outcomes in HIV-infected women: systematic review and meta-analysis protocol*. BMJ open, 2016. **6**(1): p. e008002.
  26. McHugh, M.L., *Interrater reliability: the kappa statistic*. Biochemia medica, 2012. **22**(3): p. 276-282.
  27. Moher, D., et al., *Reprint—preferred reporting items for systematic reviews and meta-analyses: the PRISMA statement*. Physical therapy, 2009. **89**(9): p. 873-880.
  28. Pluye, P., et al., *Proposal: A mixed methods appraisal tool for systematic mixed studies*

- 1  
2  
3  
4  
5  
6  
7  
8  
9  
10  
11  
12  
13  
14  
15  
16  
17  
18  
19  
20  
21  
22  
23  
24  
25  
26  
27  
28  
29  
30  
31  
32  
33  
34  
35  
36  
37  
38  
39  
40  
41  
42  
43  
44  
45  
46  
47  
48  
49  
50  
51  
52  
53  
54  
55  
56  
57  
58  
59  
60
- reviews. 2011, <http://www.webcitation.org/5tTRTc9yJ>:  
<http://mixedmethodsappraisaltoolpublic.pbworks.com>.
29. Pham, M.T., et al., *A scoping review of scoping reviews: advancing the approach and enhancing the consistency*. Research synthesis methods, 2014. **5**(4): p. 371-385.
  30. Han, X. and B. Fang, *MEASURING THE SIZE OF TOURISM AND ITS IMPACT IN AN ECONOMY*. Statistical Journal of the UN Economic Commission for Europe, 1997. **14**(4): p. 357.
  31. Gbenga, A., *Nigeria: Awry Tales of Nigerians Seeking Medical Treatment Abroad*, in *The Guardian*. 2014, @allafrica: Nigeria.
  32. Productions, D.L. <http://www.southafrica.net/za/en/articles/entry/article-southafrica.net-fertility-treatments>. 2016.
  33. Team, S.F.L.W., *High Court considers South African surrogate*, in *Family Law Newswire*. June 22, 2015, <http://www.marilynstowe.co.uk/2015/06/22/high-court-considers-south-african-surrogate/>: <http://www.marilynstowe.co.uk/2015/06/22/high-court-considers-south-african-surrogate/>.
  34. Cooke, J.G., *Public Health in Africa-A Report of the CSIS Global Health Policy Center*. Journal of Public Health in Africa, 2010. **1**(1).
  35. Kaseje, D., *Health care in Africa: Challenges, opportunities and an emerging model for improvement*. 2006.
  36. Caballero-Danell, S. and C. Mugomba, *Medical tourism and its entrepreneurial opportunities: A conceptual framework for entry into the industry*. 2007.
  37. Africa, K., *THE STATE OF HEALTHCARE IN AFRICA*. 2012, KPMG: South Africa.
  38. Ajayi, I. and I. Adewole, *Breast and cervical cancer screening activities among family physicians in Nigeria*. African journal of medicine and medical sciences, 2002. **31**(4): p. 305-309.
  39. Akukwe, C., *Healthcare delivery in Africa: issues, choices, challenges and opportunities*. African Renaissance, 2006. **3**(4).
  40. Clemens, M.A. and G. Pettersson, *New data on African health professionals abroad*. Human Resources for Health, 2008. **6**(1): p. 1-11.
  41. George, R., *Medical tourism: surgeon & safari*. South African travel and tourism cases, 2004: p. 241-243.
  42. Herrick, D.M., *Medical tourism: Global competition in health care*. National Center for Policy Analysis, 2007. **1**.
  43. Christie, I., et al., *Tourism in Africa: Harnessing tourism for growth and improved livelihoods*. 2014: World Bank Publications.
  44. Kachipande, S., *Medical Tourism in Africa: Sun, Sea, Scalpel and Safari*. 2013, Consultancy Africa Intelligence, Johannesburg, SA.
  45. Maaka, T.P., *The role of medical tourism in 21st century Africa health system*. African Renaissance, 2006. **3**(4): p. 99-110.
  46. Journal, I.M.T., *KENYA TARGETING MEDICAL TOURISM*. 2015, <http://www.imtj.com/news/kenya-targeting-medical-tourism/>.
  47. journal, I.M.T. *Nigeria plans to block outbound medical tourism*. IMTJ, 2016.
  48. Uppiah, M., et al. *The legal implications for Mauritius to develop the medical tourism sector*. in *4th Advances in Hospitality & Tourism Marketing & Management Conference, Mauritius, 25-27 June 2014*. 2014. University of Mauritius.
  49. Mahomed, S. and M.N. Slabbert, *Stem cell tourism in South Africa: The legal position*. South African Journal of Bioethics and Law, 2012. **5**(2): p. 69-73.

1  
2  
3  
4  
5  
6  
7  
8  
9  
10  
11  
12  
13  
14  
15  
16  
17  
18  
19  
20  
21  
22  
23  
24  
25  
26  
27  
28  
29  
30  
31  
32  
33  
34  
35  
36  
37  
38  
39  
40  
41  
42  
43  
44  
45  
46  
47  
48  
49  
50  
51  
52  
53  
54  
55  
56  
57  
58  
59  
60

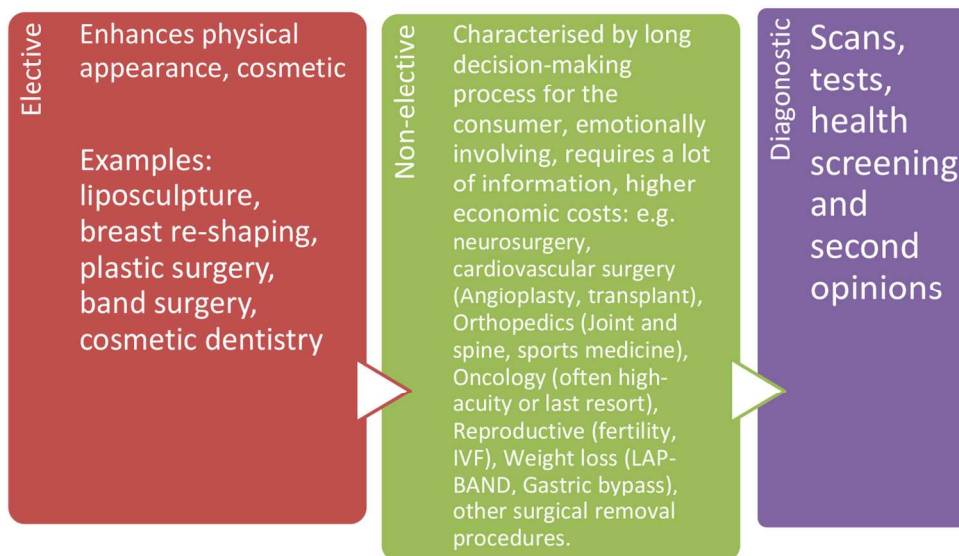

Fig.1 Medical procedures sought by medical tourists (source: author)

129x79mm (300 x 300 DPI)

Review only

1  
2  
3  
4  
5  
6  
7  
8  
9  
10  
11  
12  
13  
14  
15  
16  
17  
18  
19  
20  
21  
22  
23  
24  
25  
26  
27  
28  
29  
30  
31  
32  
33  
34  
35  
36  
37  
38  
39  
40  
41  
42  
43  
44  
45  
46  
47  
48  
49  
50  
51  
52  
53  
54  
55  
56  
57  
58  
59  
60

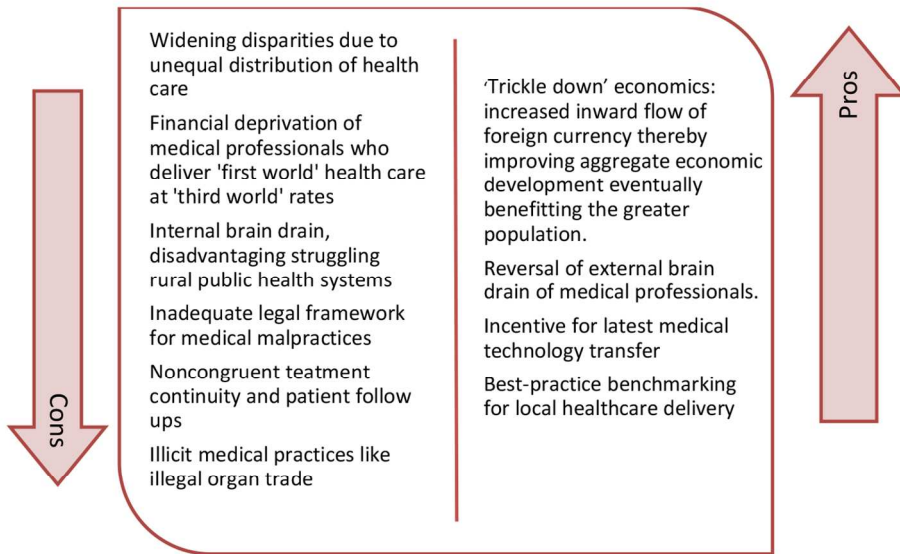

Fig.2 Advantages and disadvantages of MT in Africa  
(Source Adapted from Bookman & Bookman.)

127x75mm (300 x 300 DPI)

Review only

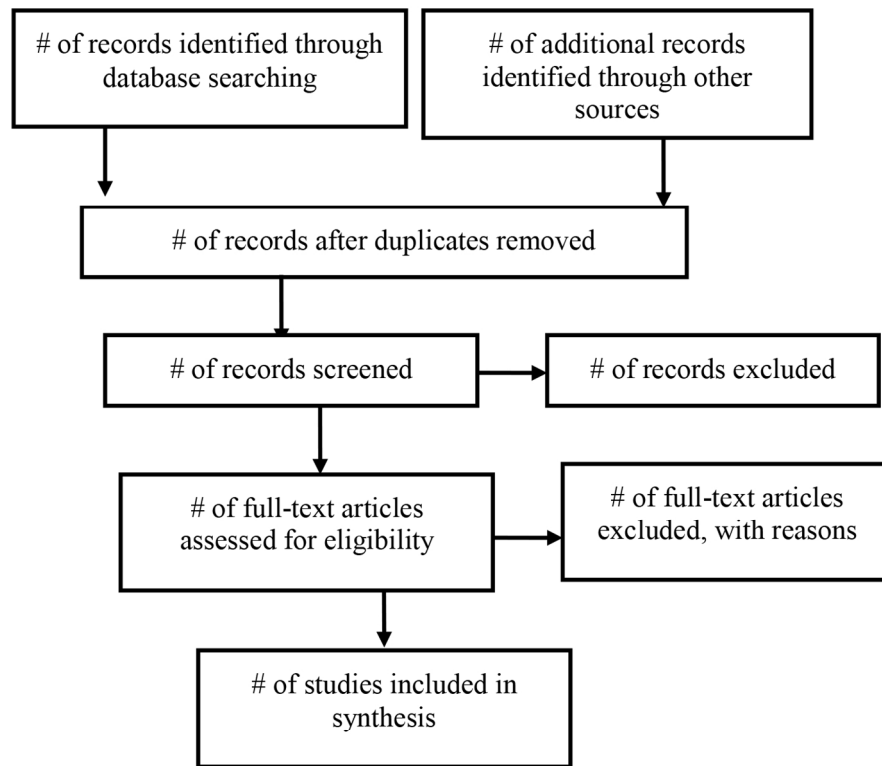

35 Fig.3 PRISMA flow diagram. (Adapted from Moher et al.)

36 136x114mm (300 x 300 DPI)

## Appendix I

"The Role, Process and Effect of Medical tourism in Africa: A Systematic Scoping Review"

### Data Extraction Instrument

|   |                                 | Document ID: |
|---|---------------------------------|--------------|
| 1 | Reviewer/Person extracting data |              |
| 2 | Date of Data Extraction         |              |
| 3 | Author, Year, Publication Type  |              |
| 4 | Journal/Publisher               |              |
| 5 | Title, full citation            |              |
| 6 | Funding Source (If Applicable)  |              |
| 7 | Target Participant(s)           |              |

|    |                      |   |                                                                                          |  |
|----|----------------------|---|------------------------------------------------------------------------------------------|--|
| 8  | Methodology          |   |                                                                                          |  |
| 9  | Method               |   |                                                                                          |  |
| 10 | Aims of study        |   |                                                                                          |  |
| 11 | Setting              |   |                                                                                          |  |
| 12 | Geographical Context |   |                                                                                          |  |
| 13 |                      |   |                                                                                          |  |
| 14 | Relevant Findings on | a | MT Advertising and Distribution Channels(Agencies, Hospital reps, Internet, other media) |  |
|    |                      | b | MT Regulatory Conditions                                                                 |  |
|    |                      | c | Ethical Issues                                                                           |  |
|    |                      | d | Hospital/Physician Specialty                                                             |  |

|   |          |   |                                                                                                  |  |
|---|----------|---|--------------------------------------------------------------------------------------------------|--|
|   |          | e | Hosp./Physician Accreditation                                                                    |  |
|   |          | f | Medical Service and Procedure Prices                                                             |  |
|   |          | g | Main MT Actors                                                                                   |  |
|   |          | h | Infrastructure /Superstructure (Hospitals, Clinics, Private Participation, Public Participation) |  |
|   |          | i | MT Promotion                                                                                     |  |
|   |          |   | Any MT Benefits, Costs, Prospects or Challenges identified                                       |  |
|   |          | j | MT Product Differentiation (Add-ons, Language used)                                              |  |
| 1 | Reviewer |   |                                                                                                  |  |
| 5 | Comments |   |                                                                                                  |  |

**Notes:**

**Methodology:** Theoretical underpinnings of the research; also whether the nature of the research is sociological, medical, legal etc

**Method:** How the data was collected; data collection tools.

**Setting:** Seeks to identify cultural features such as employment, lifestyle, ethnicity, age, gender, socio-economic class, location and time.

1  
2  
3  
4 **Participants:** Information related to the inclusion and exclusion (Sampling)  
5 criteria of the research, includes descriptions of age, gender, number of  
6 included subjects, ethnicity, level of functionality, and cultural background, if  
7 available.  
8  
9

10  
11 **Promotion:** Includes Promotional Strategies by Local/National  
12 Governments, Hospital Boards, Tourism Boards; Special Task Force  
13 Committees; Overseas Promotion; National Campaigns and Quality  
14 (Accreditation, Certification).  
15  
16  
17  
18  
19  
20  
21  
22  
23  
24  
25  
26  
27  
28  
29  
30  
31  
32  
33  
34  
35  
36  
37  
38  
39  
40  
41  
42  
43  
44  
45  
46  
47  
48  
49  
50  
51  
52  
53  
54  
55  
56  
57  
58  
59  
60



# BMJ Open

## The Role, Structure and Effect of Medical Tourism in Africa: A Systematic Scoping Review Protocol

|                                 |                                                                                                                                                                                                                                                                                                                                                                                                                           |
|---------------------------------|---------------------------------------------------------------------------------------------------------------------------------------------------------------------------------------------------------------------------------------------------------------------------------------------------------------------------------------------------------------------------------------------------------------------------|
| Journal:                        | <i>BMJ Open</i>                                                                                                                                                                                                                                                                                                                                                                                                           |
| Manuscript ID                   | bmjopen-2016-013021.R2                                                                                                                                                                                                                                                                                                                                                                                                    |
| Article Type:                   | Protocol                                                                                                                                                                                                                                                                                                                                                                                                                  |
| Date Submitted by the Author:   | 10-Oct-2016                                                                                                                                                                                                                                                                                                                                                                                                               |
| Complete List of Authors:       | Mogaka, John; University of KwaZulu-Natal College of Health Sciences, Discipline of Public Health Medicine<br>Tsoka-Gwegweni, Joyce; University of KwaZulu-Natal College of Health Sciences, Discipline of Public Health Medicine<br>Mupara, Lucia; University of KwaZulu-Natal College of Health Sciences, Discipline of Public Health Medicine<br>Mashamba-Thompson, Tivani; University of KwaZulu Natal, Public Health |
| <b>Primary Subject Heading</b>: | Global health                                                                                                                                                                                                                                                                                                                                                                                                             |
| Secondary Subject Heading:      | Health services research, Health policy, Health economics, Public health, Research methods                                                                                                                                                                                                                                                                                                                                |
| Keywords:                       | Health economics < HEALTH SERVICES ADMINISTRATION & MANAGEMENT, Health policy < HEALTH SERVICES ADMINISTRATION & MANAGEMENT, MEDICAL ETHICS, PUBLIC HEALTH, SOCIAL MEDICINE, International health services < HEALTH SERVICES ADMINISTRATION & MANAGEMENT                                                                                                                                                                  |
|                                 |                                                                                                                                                                                                                                                                                                                                                                                                                           |

SCHOLARONE™  
Manuscripts

only

# The Role, Structure and Effects of Medical Tourism in Africa: A Systematic Scoping Review Protocol

John J O Mogaka<sup>a</sup>

Joyce M Tsoka-Gwegweni<sup>1,a</sup>

Lucia M Mupara<sup>a</sup>

Tivani Mashamba-Thompson<sup>a</sup>

---

<sup>a</sup> Discipline of Public Health Medicine,  
School of Nursing and Public Health,  
University of KwaZulu Natal,  
Durban, South Africa

<sup>1</sup> Correspondence should be addressed to  
Prof. Joyce M Tsoka-Gwegweni  
Discipline of Public Health Medicine,  
School of Nursing and Public Health,  
University of KwaZulu Natal,  
Howard College Campus,  
Mazisi Kunene Avenue,  
Durban, 4041, South Africa  
Tel: +27 31 2604383/4386  
Fax: +27 31 260 4211  
Email address: [Tsokagwegweni@ukzn.ac.za](mailto:Tsokagwegweni@ukzn.ac.za)

## Abstract

**Introduction:** Some patients travel out of, while others come into Africa for medical care through a growing global phenomenon referred to as medical tourism: the travel in search of medical care that is either unavailable, unaffordable or proscribed in own healthcare systems. While some castigate medical tourism as promoting healthcare inequity, others endorse it as a revenue generator, promising local healthcare system strengthening. Currently, however, the understanding of this component of health care in Africa is inadequate. This study seeks to determine the level of knowledge on the role, structure and effect of medical tourism in Africa as it relates to healthcare systems in the region.

**Methods:** Conduct a systematic scoping review to outline the role, structure and effect of medical tourism in Africa. Databases: Academic Search Complete, Business Source Complete. Studies mapped in two stages. 1): Mapping the studies based on the relevance of their titles and subject descriptors. 2): Applying further inclusion criteria on studies from stage 1. Two reviewers will independently assess study quality and abstract data. Both quantitative and qualitative data analysis will be performed, using STATA 13 and NVIVO respectively.

**Ethics and dissemination:** PROSPERO registered (**CRD42016039745**) <http://www.crd.york.ac.uk/PROSPERO>. The study will be published and findings presented at conferences related to medical tourism, public health, health systems strengthening and tourism.

**Discussion:** Medical tourism spurs cutting-edge medical technologies, techniques and best practices in healthcare delivery. The two-tier health care landscape in Africa, however, presents an exceptionally unique context in which to situate this study. Much has been written about MT globally, but not much is known about the phenomenon in Africa; hence the appropriateness of this scientific assessment of MT in Africa. By elucidating

1  
2  
3 the role, structure and effect of this phenomenon in Africa, this study hopes  
4 to contribute to health systems strengthening in the region.  
5  
6  
7  
8

### 9 10 **Strengths and limitations of this study**

- 11 • This study offers a 'big picture' analysis of medical tourism (MT) in  
12 Africa by synthesizing vast amounts of literature on the subject.  
13
- 14 • This scoping review offers an ideal platform for synthesizing literature  
15 on MT in Africa whose methodological approaches, settings, study  
16 populations and behaviours are wide-ranging.  
17
- 18 • This approach of synthesising literature, however, presents a limitation  
19 in that a detailed analysis of case specific interventions and quality  
20 assessment of individual studies is not applicable.  
21
- 22 • As the study will only include literature published in English, studies  
23 published in other languages will be omitted. However, research shows  
24 that almost 70% -90% of published works are in English [1]. This fact  
25 minimizes adverse effects of searching publications written only in  
26 English.  
27
- 28 • To our knowledge there is paucity of scientific study on MT in Africa.  
29 While this may be a possible limitation in terms of the amount of data  
30 for this scoping review, it may be an important finding of this study  
31 and a basis for calling for more research in this area.  
32  
33  
34  
35  
36  
37  
38  
39  
40  
41  
42  
43  
44  
45

46 **Keywords:** Global Health, Health services research, Healthcare systems,  
47 Medical tourism, Public Health  
48  
49  
50  
51  
52  
53  
54  
55  
56  
57  
58  
59  
60

## Introduction

Africa is concurrently a source and destination of patients who form part of a global phenomenon referred to as health or medical tourism,[2-5] the practice of travelling abroad to consume health care that is either too delayed, unavailable, unaffordable or proscribed at their home countries[2, 6].

Medical tourism (MT) challenges the role played by traditional, nation-state-bound healthcare delivery systems. Public health core functions of assessment, policy development, and assurance with regard to the health of citizens within the state-nation are fundamentally affected by developments and expansion of MT[7, 8].

On the one hand, MT affords patients individual solution to what is traditionally considered a government concern, health for its citizens[9], thereby creating more equitable options for individuals. The wealthy middle class in Africa, for instance, regularly seek advanced medical care abroad[10].

Conversely however, MT can indicate a breakdown of service delivery in home health systems. Patients may lack confidence in the ability of home systems to meet their medical needs and move abroad in relatively large numbers.[7, 11].

Whereas MT may pose potentially attractive economic benefits to most governments in Africa, it may particularly prove challenging to local health systems, whose officials maybe tasked with both its regulation domestically and promotion internationally, while at the same time grappling with risks such endeavours pose to the national health systems.[9].

Specialized medical services and procedures offered to medical tourists include elective, non-elective and diagnostic as depicted in Fig.1.

However, current availability, pricing and geo-distribution of these procedures and services in Africa is not well-known.

Medical tourism entails highly trained and experienced physicians, high-tech medical equipment and specialised ultramodern medical facilities. Some African countries are said to have invested in or attracted ample pool of specialist physicians in quality private hospitals whose medical facilities are

1  
2  
3 similar to the ones in developed countries[10]. Costs associated with these  
4 MT infrastructure are substantial[12]. Similarly, MT is said to cause  
5 competition for best local resources including qualified medical professionals  
6 [12, 13] and transplant organs. The accrued benefits to the local host  
7 population, in turn, is however, not well-known.  
8  
9

10  
11  
12 Many arguments have been advanced for and against MT in Africa. Fig.2  
13 [12] summarizes these advantages and disadvantages.  
14  
15

16  
17  
18 The extent and dimension of these pros and cons in as far as healthcare  
19 systems in Africa are concerned, however, is inexact [3, 6, 9, 12, 14-17].  
20 The role and effects of MT in Africa needs to be investigated and  
21 documented in the face of Africa's two-tier healthcare systems, featuring a  
22 relatively efficient private and relatively overburdened public medical care  
23 sectors.  
24  
25

26  
27  
28  
29  
30  
31  
32  
33  
34  
35  
36  
37  
38  
39  
40  
41  
42  
43  
44  
45  
46  
47  
48  
49  
50  
51  
52  
53  
54  
55  
56  
57  
58  
59  
60  
61  
62  
63  
64  
65  
66  
67  
68  
69  
70  
71  
72  
73  
74  
75  
76  
77  
78  
79  
80  
81  
82  
83  
84  
85  
86  
87  
88  
89  
90  
91  
92  
93  
94  
95  
96  
97  
98  
99  
100  
101  
102  
103  
104  
105  
106  
107  
108  
109  
110  
111  
112  
113  
114  
115  
116  
117  
118  
119  
120  
121  
122  
123  
124  
125  
126  
127  
128  
129  
130  
131  
132  
133  
134  
135  
136  
137  
138  
139  
140  
141  
142  
143  
144  
145  
146  
147  
148  
149  
150  
151  
152  
153  
154  
155  
156  
157  
158  
159  
160  
161  
162  
163  
164  
165  
166  
167  
168  
169  
170  
171  
172  
173  
174  
175  
176  
177  
178  
179  
180  
181  
182  
183  
184  
185  
186  
187  
188  
189  
190  
191  
192  
193  
194  
195  
196  
197  
198  
199  
200  
201  
202  
203  
204  
205  
206  
207  
208  
209  
210  
211  
212  
213  
214  
215  
216  
217  
218  
219  
220  
221  
222  
223  
224  
225  
226  
227  
228  
229  
230  
231  
232  
233  
234  
235  
236  
237  
238  
239  
240  
241  
242  
243  
244  
245  
246  
247  
248  
249  
250  
251  
252  
253  
254  
255  
256  
257  
258  
259  
260  
261  
262  
263  
264  
265  
266  
267  
268  
269  
270  
271  
272  
273  
274  
275  
276  
277  
278  
279  
280  
281  
282  
283  
284  
285  
286  
287  
288  
289  
290  
291  
292  
293  
294  
295  
296  
297  
298  
299  
300  
301  
302  
303  
304  
305  
306  
307  
308  
309  
310  
311  
312  
313  
314  
315  
316  
317  
318  
319  
320  
321  
322  
323  
324  
325  
326  
327  
328  
329  
330  
331  
332  
333  
334  
335  
336  
337  
338  
339  
340  
341  
342  
343  
344  
345  
346  
347  
348  
349  
350  
351  
352  
353  
354  
355  
356  
357  
358  
359  
360  
361  
362  
363  
364  
365  
366  
367  
368  
369  
370  
371  
372  
373  
374  
375  
376  
377  
378  
379  
380  
381  
382  
383  
384  
385  
386  
387  
388  
389  
390  
391  
392  
393  
394  
395  
396  
397  
398  
399  
400  
401  
402  
403  
404  
405  
406  
407  
408  
409  
410  
411  
412  
413  
414  
415  
416  
417  
418  
419  
420  
421  
422  
423  
424  
425  
426  
427  
428  
429  
430  
431  
432  
433  
434  
435  
436  
437  
438  
439  
440  
441  
442  
443  
444  
445  
446  
447  
448  
449  
450  
451  
452  
453  
454  
455  
456  
457  
458  
459  
460  
461  
462  
463  
464  
465  
466  
467  
468  
469  
470  
471  
472  
473  
474  
475  
476  
477  
478  
479  
480  
481  
482  
483  
484  
485  
486  
487  
488  
489  
490  
491  
492  
493  
494  
495  
496  
497  
498  
499  
500  
501  
502  
503  
504  
505  
506  
507  
508  
509  
510  
511  
512  
513  
514  
515  
516  
517  
518  
519  
520  
521  
522  
523  
524  
525  
526  
527  
528  
529  
530  
531  
532  
533  
534  
535  
536  
537  
538  
539  
540  
541  
542  
543  
544  
545  
546  
547  
548  
549  
550  
551  
552  
553  
554  
555  
556  
557  
558  
559  
560  
561  
562  
563  
564  
565  
566  
567  
568  
569  
570  
571  
572  
573  
574  
575  
576  
577  
578  
579  
580  
581  
582  
583  
584  
585  
586  
587  
588  
589  
590  
591  
592  
593  
594  
595  
596  
597  
598  
599  
600  
601  
602  
603  
604  
605  
606  
607  
608  
609  
610  
611  
612  
613  
614  
615  
616  
617  
618  
619  
620  
621  
622  
623  
624  
625  
626  
627  
628  
629  
630  
631  
632  
633  
634  
635  
636  
637  
638  
639  
640  
641  
642  
643  
644  
645  
646  
647  
648  
649  
650  
651  
652  
653  
654  
655  
656  
657  
658  
659  
660  
661  
662  
663  
664  
665  
666  
667  
668  
669  
670  
671  
672  
673  
674  
675  
676  
677  
678  
679  
680  
681  
682  
683  
684  
685  
686  
687  
688  
689  
690  
691  
692  
693  
694  
695  
696  
697  
698  
699  
700  
701  
702  
703  
704  
705  
706  
707  
708  
709  
710  
711  
712  
713  
714  
715  
716  
717  
718  
719  
720  
721  
722  
723  
724  
725  
726  
727  
728  
729  
730  
731  
732  
733  
734  
735  
736  
737  
738  
739  
740  
741  
742  
743  
744  
745  
746  
747  
748  
749  
750  
751  
752  
753  
754  
755  
756  
757  
758  
759  
760  
761  
762  
763  
764  
765  
766  
767  
768  
769  
770  
771  
772  
773  
774  
775  
776  
777  
778  
779  
780  
781  
782  
783  
784  
785  
786  
787  
788  
789  
790  
791  
792  
793  
794  
795  
796  
797  
798  
799  
800  
801  
802  
803  
804  
805  
806  
807  
808  
809  
810  
811  
812  
813  
814  
815  
816  
817  
818  
819  
820  
821  
822  
823  
824  
825  
826  
827  
828  
829  
830  
831  
832  
833  
834  
835  
836  
837  
838  
839  
840  
841  
842  
843  
844  
845  
846  
847  
848  
849  
850  
851  
852  
853  
854  
855  
856  
857  
858  
859  
860  
861  
862  
863  
864  
865  
866  
867  
868  
869  
870  
871  
872  
873  
874  
875  
876  
877  
878  
879  
880  
881  
882  
883  
884  
885  
886  
887  
888  
889  
890  
891  
892  
893  
894  
895  
896  
897  
898  
899  
900  
901  
902  
903  
904  
905  
906  
907  
908  
909  
910  
911  
912  
913  
914  
915  
916  
917  
918  
919  
920  
921  
922  
923  
924  
925  
926  
927  
928  
929  
930  
931  
932  
933  
934  
935  
936  
937  
938  
939  
940  
941  
942  
943  
944  
945  
946  
947  
948  
949  
950  
951  
952  
953  
954  
955  
956  
957  
958  
959  
960  
961  
962  
963  
964  
965  
966  
967  
968  
969  
970  
971  
972  
973  
974  
975  
976  
977  
978  
979  
980  
981  
982  
983  
984  
985  
986  
987  
988  
989  
990  
991  
992  
993  
994  
995  
996  
997  
998  
999  
1000

MT services are generally provided by the private sector and payments are mostly out-of-pocket. Whereas private health care providers have little incentive to consider population-based services, the public at large must be served through public health interventions focused on the health needs of the entire population or population groups. Individual health care, population health and public policy decisions must, therefore, be premised on best available evidence to avoid poor and inappropriate interventions [4, 15, 17-20]. However, for MT in Africa, this is clearly difficult because of paucity of scientific evidence on the subject. Secondly, even with the available evidence, the information generated individually by the studies may be biased, methodologically flawed, time and context constrained, resulting in conflicting conclusions. This does not allow MT in Africa to be understood well[21]. Hence the necessity and justification for this scoping review, whose purpose is to assess current level of knowledge on MT in Africa with a reference to Africa's healthcare systems, by systematically reviewing

1  
2  
3 available literature on the subject. The study will focus on MT out of, into  
4 and intra-Africa flows.  
5  
6

7 In this study, we take the geo-scheme for Africa approach used by the  
8 African Union and United Nations in dividing the region directionally[22]:  
9  
10

- 11 • North Africa lies north of the Sahara and runs along the  
12 Mediterranean coast.
- 13 • West Africa excludes Northern Africa and the Maghreb and includes the  
14 large portions of the Sahara Desert and the Adamawa Mountains.
- 15 • East Africa stretches from the Horn of Africa to Mozambique, including  
16 Madagascar, Seychelles and Mauritius
- 17 • Central Africa is the large mass at the center of Africa which either does  
18 not fall squarely into any other region or only partially does so.
- 19 • Southern Africa consists of the portion generally south of -10° latitude  
20 and the great rainforests of Congo.  
21  
22  
23  
24  
25  
26  
27  
28

29 The main aim of this study is to outline the role, structure and effect of  
30 medical tourism in Africa as it relates to Africa's healthcare systems by  
31 answering the following specific questions:  
32  
33

- 34 i. What is published about Africa's MT infrastructure: the availability,  
35 pricing and geo-distribution of specialized medical procedures and  
36 services offered to medical tourists in Africa?  
37  
38
- 39 ii. Who are the main medical tourism actors in Africa, as identified in the  
40 literature?  
41  
42
- 43 iii. What are the identified effects of medical tourism on healthcare  
44 systems in Africa?  
45  
46
- 47 iv. What are the identified ethical issues associated with medical tourism  
48 in Africa?  
49  
50

## 51 **Methods**

52  
53

54 The study will employ Arksey and O'Malley scoping review framework as well  
55 as incorporate recent scoping review suggestions by Levac et al[23, 24].  
56  
57  
58  
59  
60

## Identification of relevant studies

### a) Key terms

Multiple terms are used to refer to MT in literature. Evidence indicate that while literature on MT is generally growing, it is mostly focused either on individual case studies or specific aspects of MT [11]. Therefore, an extensive list of primary and secondary search terms will be developed. Search terms will include: medical tourism, stem cell tourism, fertility tourism, dental tourism, health tourism and transplant tourism, among other terms with Africa as the bounding parameter. The university librarian will help in finalizing the keyword and search strategy in this study. Attempt will be made to obtain relevant documents that are not readily available through concerned authors or publishers.

### b) Databases:

Academic databases: Academic Search Complete, Business Source Complete, PsycARTICLES (EBSCO), PsycINFO (EBSCO), Health Source - Consumer Edition, Health Source- Nursing/Academic Edition and sabinet.

Search engines: Google and google scholar.

Relevant MT industry associations, OECD, WHO, Worldbank and other multilateral organizations' websites will be used to search for government reports, practice guidelines and industry reports.

Relevant research dissertations will be searched through worldcat via oclc, and reference list scanning of included studies.

### c) Search strategy:

The databases selected will cover a broad range of disciplines to ensure sensitivity. Search queries will be tailored to specific requirements for each database. For academic databases, keywords will be combined using Boolean operators (AND, OR, NOT). A snowball technique will be used to find related works.



However, since this will be an iterative process, the detailed search strategy will be documented in the analysis and write up of the full review.

Researchers will keep an updated record on dates and the numbers of publications identified during each session of literature search using a search records table[25] as shown below:

| Date | Keyword searched | Search engine used | Number of publications retrieved |
|------|------------------|--------------------|----------------------------------|
|      |                  |                    |                                  |

Table 1: Electronic search record(source: Adapted from Mashamba-Thomson T.P. et al [25])

### Study Selection (Screening)

A two-stage screening process will be used to assess the relevance of studies identified in the search. Two reviewers will independently evaluate and apply the identified selection criteria to the candidate literature titles and abstracts. Titles and abstracts will be screened as "include", "exclude" or "uncertain". Full text of articles screened as "uncertain" will be reviewed by the third reviewer for verification against the inclusion criteria. During the first stage, only the title and abstract of citations will be reviewed to preclude articles that do not meet the minimum inclusion criteria. A title and abstract relevance screening form will be developed and pretested on a convenience sample of 10 academic citations to evaluate reviewer agreement. A kappa calculation will be done based on the results of this pre-test. This will in turn be used to show the reviewers' inter-rater agreement level. Generally, a kappa score over 0.8 is considered a high level of agreement [26]. In accordance with recommendations by Levac et al.[24], after reviewing every batch of 20 to 30 publications, the reviewers will meet

1  
2  
3 to resolve any conflicts and ensure consistency with the research question  
4 and purpose.  
5  
6

7  
8 Executive summaries in grey literature will be treated as abstracts. Relevant  
9 titles whose abstracts are not available will be taken to screening stage two  
10 for full review. During screening stage two, reviewers will independently  
11 screen the rest of the search results using the pre-defined inclusion-  
12 exclusion criteria. Any ensuing discrepancies will be resolved by discussion  
13 or the involvement of the third reviewer.  
14  
15  
16  
17  
18

19 To capture and present the screening process, the Preferred Reporting Items  
20 for Systematic and Meta- Analyses (PRISMA) flow diagram in Fig.3 [27] will  
21 be used.  
22  
23  
24

25  
26 Inclusion criteria:  
27

- 28  
29
- Evidence published in English.
  - There will be no publication date restrictions up to 06 June 2016.
  - Literature with substantial focus on MT in Africa including: peer-reviewed journal articles, systematic reviews, scoping reviews, meta-analysis and rapid reviews, government and NGO reports and academic dissertations.

30  
31  
32  
33  
34  
35  
36  
37  
38  
39  
40 Research focusing on MT in Low and Medium Income Countries(LMICs)  
41 and whose conclusions and discussion demonstrate transferable  
42 findings to African settings.  
43  
44

- 45  
46  
47  
48  
49  
50  
51  
52
- All study designs will be considered including qualitative, quantitative and mixed methods studies.
  - Studies focusing on health care provision through specified bi- or multilateral government agreements in Africa.

53  
54 Exclusion criteria:  
55  
56  
57  
58  
59  
60

- Evidence focusing on MT outside Africa and whose results are non-transferable to African settings.
- Evidence focusing on people forced to seek emergency medical care in conflict or post-conflict settings as opposed to organised medical travel in non-conflict settings.
- Evidence with focus on emergency medical care for conventional tourists.
- Evidence where medical care provision to medical tourists is not explicitly differentiated from the day to day provision of health care offered to the general public.
- Evidence with main focus on wellness tourism

### **Charting the Evidence (Data Abstraction)**

After title and abstract screening, successful candidate citations will be exported to Endnote bibliographic dataset for subsequent full text review. Endnote library application will be utilized to discard any duplicates. A data abstraction spreadsheet will be developed collectively by the reviewers to extract pre-determined variables and themes. Structuring this spreadsheet database will involve selecting and defining data categories and subcategories, as advised by the MT conceptual framework [21]. It will be secured online so that involved reviewers will have access and can make updates freely.

Bibliographic details, study design, number of participants, intervention(s), comparison(s), study setting, funding source and conclusions for the primary and secondary outcomes of interest will be extracted. This dataset will be populated from each selected paper. This step will be done iteratively as more familiarity of literature is gained and revisions done as appropriate. The data extraction form is attached as Appendix I.

## **Risk of bias (quality) assessment of individual studies**

Methodological quality of quantitative, qualitative and mixed methods primary studies will be assessed using the Mixed Methods Appraisal Tool (MMAT) [28]. Studies will not be excluded on account of low quality scores, but quality scores will be reported and considered in the narrative synthesis of the evidence.

## **Collating, Summarizing, and Reporting the Data**

The extracted data will be summarized and presented. This is in line with the purpose of a scoping review which is geared towards establishing the scope of the current evidence, summarizing the results as presented across articles, and not synthesizing or distilling specific results [23, 24, 29]. The data will be analysed accordingly to address the main aim and the four specific study questions. Further to this, the study team will scrutinize the meanings of the findings as they relate to overall purpose of the study, discuss the implications for future research, practice and policy.

Data analysis will employ both quantitative and qualitative methods.

After the coding and validation of the spreadsheet file, the data will be exported into STATA 13 for analysis. Descriptive statistics will be used to summarize the data. Frequencies and percentages will be used to describe nominal data. A basic statistical account of the amount, type, and distribution of the studies included in the review will be presented.

Also, a thematic analysis and concept map of the results will be presented. Thematic analysis will be carried out using NVIVO research software.

This analysis will generally answer questions like: how large is the literature on MT in Africa (number of papers), when was it published (age), where was the research conducted (geographic distribution), at what scale, and by whom (geographic/institution); where, when, and by whom research was

1  
2  
3 published; the geographical spread of the research; types of methods used;  
4 types of subjects examined; types of variables measured; different  
5 disciplines assessing the topic; and patterns found in research results. We  
6 will use statistical means to produce tables and charts that depict cross-  
7 tabulations like: MT in Africa as it relates to study designs used, type of  
8 treatments, medical facilities, and selected patient characteristics (such as  
9 age, sex, geography, ethnicity).  
10  
11  
12  
13  
14  
15  
16

### 17 **Ethics and dissemination**

18  
19 The protocol for the systematic review has also been registered in  
20 PROSPERO (**Regn. No: RD42016039745**, <http://www.crd.york.ac.uk/PROSPERO>).  
21  
22 The results will be disseminated by publication in peer-reviewed journal and  
23 presented at a relevant conference.  
24  
25  
26  
27

### 28 **Discussion**

29  
30 Medical tourism is different from medical care administered to conventional  
31 tourists in need of emergency medical care. Unlike the latter, the former  
32 specifically refers to 'foreign patients' who travel abroad for the express  
33 purpose of obtaining medical care [17]. Medical tourism is defined as a set  
34 of socioeconomic activities carried out either by or for medical tourists [30].  
35 The activities carried out by medical tourists correspond to the travel of  
36 patients in search of health services outside the jurisdiction of their home  
37 health systems [21], while those carried out for them correspond to  
38 attempts on the part of destinations to attract international patients by  
39 promoting their health care services and facilities [21]. Although there is no  
40 standard meaning that is assigned to it, the term "tourism" could refer to  
41 the measures taken by destination countries (supply side) to attract and  
42 meet the needs of international patients. The term could also refer to the  
43 tourism channels the medical tourist utilizes to get to the destination  
44 countries.  
45  
46  
47  
48  
49  
50  
51  
52  
53  
54  
55  
56  
57  
58  
59  
60

1  
2  
3 In light of the above, therefore, evidence with focus on emergency medical  
4 care for conventional tourists will be excluded.  
5  
6

7  
8 This study will include literature on formal bi- and multilateral medical care  
9 agreements that enable patients to be attended to in other countries, but  
10 exclude those papers that focus on 'forced' cross-border medical care,  
11 especially if public health facilities of destination countries are 'forced' to  
12 provide the care on humanitarian grounds. This condition exists especially in  
13 conflict and post-conflict zones.  
14  
15  
16  
17  
18

19  
20 Evidence on MT that is global in outlook will be included in-as-far-as its  
21 findings are relevant to Africa and its healthcare systems. Relevance will be  
22 informed as progressive familiarity with literature is gained in this study.  
23  
24

25  
26 Africa presents exceptionally unique and fascinating context in which to  
27 situate this MT study. This is because of the stark contrast in the African  
28 health care landscape: whereas medical tourism demands highly specialized  
29 medics, capable of executing most complicated surgeries, clad in advanced  
30 medical technologies and luxury, specialized hospitals, Africa, on the other  
31 hand, has a large local populations enduring rudimentary health, insufficient  
32 clean water and inadequate sanitation.  
33  
34  
35  
36  
37  
38

39  
40 To our knowledge, this is the first systematic scoping review that attempts  
41 to expound on the role, structure and effect of MT as it relates to healthcare  
42 systems in Africa. Most MT evidence on Africa is emergent and multi-  
43 disciplinary in nature, hence the critical necessity of a scoping review to map  
44 the range of extant evidence and systematically identify research gaps to  
45 more clearly illumine the role, structure and effects of MT in Africa.  
46  
47  
48  
49  
50

51  
52 It is anticipated that while findings from this study will lead to clearer  
53 understanding of MT in Africa, they will also contribute to the resolving of  
54 paradoxical healthcare issues in the Africa. The needs of 'foreign' patients  
55 may be prioritized over those of locals, especially if economic incentives  
56  
57  
58  
59  
60

1  
2  
3  
4  
5  
6  
7  
8  
9  
10  
11  
12  
13  
14  
15  
16  
17  
18  
19  
20  
21  
22  
23  
24  
25  
26  
27  
28  
29  
30  
31  
32  
33  
34  
35  
36  
37  
38  
39  
40  
41  
42  
43  
44  
45  
46  
47  
48  
49  
50  
51  
52  
53  
54  
55  
56  
57  
58  
59  
60

overweigh public health considerations, thereby unfairly shifting resources towards the development of more expensive clinical interventions that cater for exclusive few, while promoting healthcare inequity [7, 9, 31]. For instance, reproductive tourism utilizes expensive and non-routine medical expertise to bring new children into this world [32, 33], yet yearly, malaria, pneumonia and other preventable infections kill millions of under-fives in Africa[34, 35].

MT is promoted as a solution to healthcare queues in some parts of the world [2, 10, 12, 14, 16, 36]. Able-to-pay patients opt to fly into Africa to avoid these long queues in order to get faster service. But, in sharp contrast, local patients are forced to experience similar long queues in overly over-subscribed and underfunded local health systems [10, 35, 37-40].

Some literature suggest that MT has been growing globally[12, 41, 42]. This growth, however, seems to be based solely on MT advantages to medical tourists, destination countries and healthcare providers. Medical tourists benefit from preferential treatment, based on their ability to pay for medical services [21]. Destination countries benefit in revenue generation [12, 43, 44].

Motivated by these benefits, many African countries are competing for the global medical tourism dollar [45-47]. Unfortunately, MT in most of these countries is based on unsustainable, haphazard regulatory frameworks [48].

Given its potential contextual significance, it is imperative that a scientific reconnaissance study be carried out on MT in Africa. This scoping study is, therefore, an attempt to do this by providing more information about MT in Africa to policy makers, healthcare providers, potential patients and future researchers, hoping to contribute to improved healthcare systems in Africa.

## Acknowledgements

We would like to thank the College of Health Sciences, University of KwaZulu-Natal for providing support in carrying out this study. Furthermore, we would like to thank Duke Magwaza, UKZN librarian, for his support in database search strategy.

## Footnotes

Contributors: JJOM and JMTG conceptualised, JJOM and TPMT designed the study. LMM and JJOM prepared the draft of the research proposal. JMTG and JJOM developed the background. JJOM and TPMT contributed to developing methods relating to review and synthesis of data. All authors planned the output of the review. All authors reviewed draft versions of the manuscript and approved the final version of the manuscript.

**Competing interests:** Authors declare no competing interests.

**Funding:** This research received no specific grant from any funding agency in the public, commercial or not-for-profit sectors

## References

1. Pickering, C. and J. Byrne, *The benefits of publishing systematic quantitative literature reviews for PhD candidates and other early-career researchers*. Higher Education Research & Development, 2014. **33**(3): p. 534-548.
2. Alsharif, M.J., R. Labonté, and Z. Lu, *Patients beyond borders: A study of medical tourists in four countries*. Global Social Policy, 2010. **10**(3): p. 315-335.
3. Hall, C.M. and C.M. Hall, *Health and medical tourism: a kill or cure for global public health?* Tourism review, 2011. **66**(1/2): p. 4-15.
4. Johnston, R., et al., *What is known about the effects of medical tourism in destination and departure countries? A scoping review*. International Journal for Equity in Health, 2010. **9**(1): p. 24.
5. Turner, L.G., *Quality in health care and globalization of health services: accreditation and regulatory oversight of medical tourism companies*. International Journal for Quality in Health Care, 2010: p. mzzq078.
6. Reddy, S.G., *Medical tourism in India: an exploratory study*. 2013, Kansas State University.
7. Dominique, M. *Medical Tourism and Cross-border Care*. 2013.



- 1  
2  
3  
4  
5  
6  
7  
8  
9  
10  
11  
12  
13  
14  
15  
16  
17  
18  
19  
20  
21  
22  
23  
24  
25  
26  
27  
28  
29  
30  
31  
32  
33  
34  
35  
36  
37  
38  
39  
40  
41  
42  
43  
44  
45  
46  
47  
48  
49  
50  
51  
52  
53  
54  
55  
56  
57  
58  
59  
60
8. Handler, A., M. Issel, and B. Turnock, *A conceptual framework to measure performance of the public health system*. American Journal of Public Health, 2001. **91**(8): p. 1235-1239.
  9. Pocock, N.S. and K.H. Phua, *Medical tourism and policy implications for health systems: a conceptual framework from a comparative study of Thailand, Singapore and Malaysia*. Globalization and health, 2011. **7**(1): p. 1.
  10. Ahwireng-Obeng, F. and C. van Loggerenberg, *Africa's middle class women bring entrepreneurial opportunities in breast care medical tourism to South Africa*. The International journal of health planning and management, 2011. **26**(1): p. 39-55.
  11. Hanefeld, J., et al., *Why do medical tourists travel to where they do? The role of networks in determining medical travel*. Social Science & Medicine, 2015. **124**: p. 356-363.
  12. Bookman, M.Z. and K.R. Bookman, *Medical Tourism in Developing Countries*. 2007, 175 Fifth Avenue, New York, N.Y. 10010 PALGRAVE MACMILLAN.
  13. Turner, L., *'First world health care at third world prices': globalization, bioethics and medical tourism*. BioSocieties, 2007. **2**(03): p. 303-325.
  14. Connell, J., *Contemporary medical tourism: Conceptualisation, culture and commodification*. Tourism Management, 2013. **34**: p. 1-13.
  15. Crush, J. and A. Chikanda, *South-South medical tourism and the quest for health in Southern Africa*. Social Science & Medicine, 2015. **124**: p. 313-320.
  16. Crush, J., et al., *South-South and North-South medical tourism: the case of South Africa*. Travelling well: Essays in medical tourism. Ottawa: Institute of Population Health, University of Ottawa, 2013: p. 43-61.
  17. Lunt, N., M. Hardey, and R. Mannion, *Nip, tuck and click: medical tourism and the emergence of web-based health information*. The Open Medical Informatics Journal, 2010. **4**(1).
  18. Abdullahel, H., *Globalization, medical tourism and health equity*, in *Symposium on Implications of Medical Tourism for Canadian Health and Health Policy*. 2009: Ottawa, Canada.
  19. Crooks, V.A., et al., *What is known about the patient's experience of medical tourism? A scoping review*. BMC Health Services Research, 2010. **10**(1): p. 1.
  20. Runnels, V., et al., *12 Conclusions: Medical Tourism Today and Tomorrow*, in *Transdisciplinary Studies in Population Health Series*. p. Chapt 12.
  21. Heung, V.C., D. Kucukusta, and H. Song, *A conceptual model of medical tourism: Implications for future research*. Journal of Travel & Tourism Marketing, 2010. **27**(3): p. 236-251.
  22. Division, U.N.S. *Standard Country and Area Codes Classifications (M49)*. 2016 [cited 2016 26 July]; Available from: <http://unstats.un.org/unsd/methods/m49/m49regin.htm>.
  23. H., A. and O.M. L., *Scoping Studies: Towards a Methodological Framework*. International Journal of Social Research Methodology, 2005. **8**(1): p. pp 19 - 32.
  24. Levac, D., H. Colquhoun, and K.K. O'Brien, *Scoping studies: advancing the methodology*. Implement Sci, 2010. **5**(1): p. 1-9.
  25. Mashamba-Thompson, T., et al., *Impact of point-of-care diagnostics on maternal outcomes in HIV-infected women: systematic review and meta-analysis protocol*. BMJ open, 2016. **6**(1): p. e008002.
  26. McHugh, M.L., *Interrater reliability: the kappa statistic*. Biochemia medica, 2012. **22**(3): p. 276-282.
  27. Moher, D., et al., *Reprint—preferred reporting items for systematic reviews and meta-analyses: the PRISMA statement*. Physical therapy, 2009. **89**(9): p. 873-880.
  28. Pluye, P., et al., *Proposal: A mixed methods appraisal tool for systematic mixed studies*

- 1  
2  
3  
4  
5  
6  
7  
8  
9  
10  
11  
12  
13  
14  
15  
16  
17  
18  
19  
20  
21  
22  
23  
24  
25  
26  
27  
28  
29  
30  
31  
32  
33  
34  
35  
36  
37  
38  
39  
40  
41  
42  
43  
44  
45  
46  
47  
48  
49  
50  
51  
52  
53  
54  
55  
56  
57  
58  
59  
60
- reviews. 2011, <http://www.webcitation.org/5tTRTc9yJ>:  
<http://mixedmethodsappraisaltoolpublic.pbworks.com>.
29. Pham, M.T., et al., *A scoping review of scoping reviews: advancing the approach and enhancing the consistency*. Research synthesis methods, 2014. **5**(4): p. 371-385.
  30. Han, X. and B. Fang, *MEASURING THE SIZE OF TOURISM AND ITS IMPACT IN AN ECONOMY*. Statistical Journal of the UN Economic Commission for Europe, 1997. **14**(4): p. 357.
  31. Gbenga, A., *Nigeria: Awry Tales of Nigerians Seeking Medical Treatment Abroad*, in *The Guardian*. 2014, @allafrica: Nigeria.
  32. Productions, D.L. <http://www.southafrica.net/za/en/articles/entry/article-southafrica.net-fertility-treatments>. 2016.
  33. Team, S.F.L.W., *High Court considers South African surrogate*, in *Family Law Newswire*. June 22, 2015, <http://www.marilynstowe.co.uk/2015/06/22/high-court-considers-south-african-surrogate/>: <http://www.marilynstowe.co.uk/2015/06/22/high-court-considers-south-african-surrogate/>.
  34. Cooke, J.G., *Public Health in Africa-A Report of the CSIS Global Health Policy Center*. Journal of Public Health in Africa, 2010. **1**(1).
  35. Kaseje, D., *Health care in Africa: Challenges, opportunities and an emerging model for improvement*. 2006.
  36. Caballero-Danell, S. and C. Mugomba, *Medical tourism and its entrepreneurial opportunities: A conceptual framework for entry into the industry*. 2007.
  37. Africa, K., *THE STATE OF HEALTHCARE IN AFRICA*. 2012, KPMG: South Africa.
  38. Ajayi, I. and I. Adewole, *Breast and cervical cancer screening activities among family physicians in Nigeria*. African journal of medicine and medical sciences, 2002. **31**(4): p. 305-309.
  39. Akukwe, C., *Healthcare delivery in Africa: issues, choices, challenges and opportunities*. African Renaissance, 2006. **3**(4).
  40. Clemens, M.A. and G. Pettersson, *New data on African health professionals abroad*. Human Resources for Health, 2008. **6**(1): p. 1-11.
  41. George, R., *Medical tourism: surgeon & safari*. South African travel and tourism cases, 2004: p. 241-243.
  42. Herrick, D.M., *Medical tourism: Global competition in health care*. National Center for Policy Analysis, 2007. **1**.
  43. Christie, I., et al., *Tourism in Africa: Harnessing tourism for growth and improved livelihoods*. 2014: World Bank Publications.
  44. Kachipande, S., *Medical Tourism in Africa: Sun, Sea, Scalpel and Safari*. 2013, Consultancy Africa Intelligence, Johannesburg, SA.
  45. Maaka, T.P., *The role of medical tourism in 21st century Africa health system*. African Renaissance, 2006. **3**(4): p. 99-110.
  46. Journal, I.M.T., *KENYA TARGETING MEDICAL TOURISM*. 2015, <http://www.imtj.com/news/kenya-targeting-medical-tourism/>.
  47. Uppiah, M., et al. *The legal implications for Mauritius to develop the medical tourism sector*. in *4th Advances in Hospitality & Tourism Marketing & Management Conference, Mauritius, 25-27 June 2014*. 2014. University of Mauritius.
  48. Mahomed, S. and M.N. Slabbert, *Stem cell tourism in South Africa: The legal position*. South African Journal of Bioethics and Law, 2012. **5**(2): p. 69-73.

1  
2  
3  
4  
5  
6  
7  
8  
9  
10  
11  
12  
13  
14  
15  
16  
17  
18  
19  
20  
21  
22  
23  
24  
25  
26  
27  
28  
29  
30  
31  
32  
33  
34  
35  
36  
37  
38  
39  
40  
41  
42  
43  
44  
45  
46  
47  
48  
49  
50  
51  
52  
53  
54  
55  
56  
57  
58  
59  
60

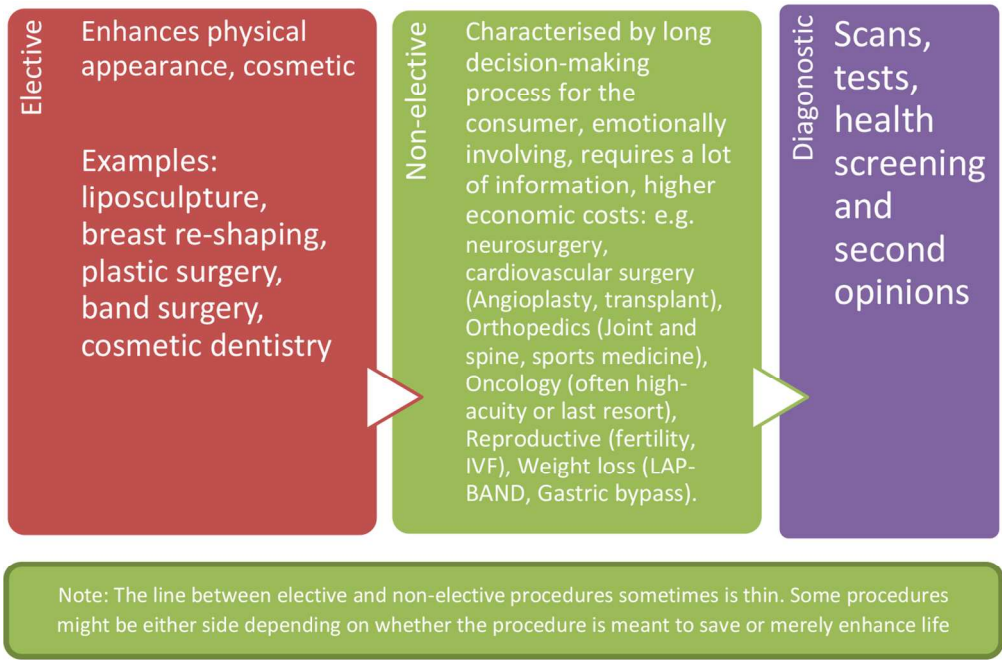

126x83mm (300 x 300 DPI)

view only

1  
2  
3  
4  
5  
6  
7  
8  
9  
10  
11  
12  
13  
14  
15  
16  
17  
18  
19  
20  
21  
22  
23  
24  
25  
26  
27  
28  
29  
30  
31  
32  
33  
34  
35  
36  
37  
38  
39  
40  
41  
42  
43  
44  
45  
46  
47  
48  
49  
50  
51  
52  
53  
54  
55  
56  
57  
58  
59  
60



Fig.2 Advantages and disadvantages of MT in Africa  
(Source Adapted from Bookman & Bookman.)

127x75mm (300 x 300 DPI)

Review only



35 Fig.3 PRISMA flow diagram. (Adapted from Moher et al.)

36 136x114mm (300 x 300 DPI)

## Appendix I

"The Role, Process and Effect of Medical tourism in Africa: A Systematic Scoping Review"

### Data Extraction Instrument

|   |                                 | Document ID: |
|---|---------------------------------|--------------|
| 1 | Reviewer/Person extracting data |              |
| 2 | Date of Data Extraction         |              |
| 3 | Author, Year, Publication Type  |              |
| 4 | Journal/Publisher               |              |
| 5 | Title, full citation            |              |
| 6 | Funding Source (If Applicable)  |              |
| 7 | Target Participant(s)           |              |

|    |                      |   |                                                                                          |
|----|----------------------|---|------------------------------------------------------------------------------------------|
| 8  | Methodology          |   |                                                                                          |
| 9  | Method               |   |                                                                                          |
| 10 | Aims of study        |   |                                                                                          |
| 11 | Setting              |   |                                                                                          |
| 12 | Geographical Context |   |                                                                                          |
| 13 |                      |   |                                                                                          |
| 14 | Relevant Findings on | a | MT Advertising and Distribution Channels(Agencies, Hospital reps, Internet, other media) |
|    |                      | b | MT Regulatory Conditions                                                                 |
|    |                      | c | Ethical Issues                                                                           |
|    |                      | d | Hospital/Physician Specialty                                                             |

|   |          |   |                                                                                                  |  |
|---|----------|---|--------------------------------------------------------------------------------------------------|--|
|   |          | e | Hosp./Physician Accreditation                                                                    |  |
|   |          | f | Medical Service and Procedure Prices                                                             |  |
|   |          | g | Main MT Actors                                                                                   |  |
|   |          | h | Infrastructure /Superstructure (Hospitals, Clinics, Private Participation, Public Participation) |  |
|   |          | i | MT Promotion                                                                                     |  |
|   |          |   | Any MT Benefits, Costs, Prospects or Challenges identified                                       |  |
|   |          | j | MT Product Differentiation (Add-ons, Language used)                                              |  |
| 1 | Reviewer |   |                                                                                                  |  |
| 5 | Comments |   |                                                                                                  |  |

**Notes:**

**Methodology:** Theoretical underpinnings of the research; also whether the nature of the research is sociological, medical, legal etc

**Method:** How the data was collected; data collection tools.

**Setting:** Seeks to identify cultural features such as employment, lifestyle, ethnicity, age, gender, socio-economic class, location and time.

1  
2  
3  
4 **Participants:** Information related to the inclusion and exclusion (Sampling)  
5 criteria of the research, includes descriptions of age, gender, number of  
6 included subjects, ethnicity, level of functionality, and cultural background, if  
7 available.  
8  
9

10  
11 **Promotion:** Includes Promotional Strategies by Local/National  
12 Governments, Hospital Boards, Tourism Boards; Special Task Force  
13 Committees; Overseas Promotion; National Campaigns and Quality  
14 (Accreditation, Certification).  
15  
16  
17  
18  
19  
20  
21  
22  
23  
24  
25  
26  
27  
28  
29  
30  
31  
32  
33  
34  
35  
36  
37  
38  
39  
40  
41  
42  
43  
44  
45  
46  
47  
48  
49  
50  
51  
52  
53  
54  
55  
56  
57  
58  
59  
60
