# Supplementary material for: Role, structure and effects of medical tourism in Africa: a systematic scoping review protocol
Source: PubMed Central journal article supplement — BMJ Open. 2017 Jun 23;7(6):e013021. doi: 10.1136/bmjopen-2016-013021 (PMC5541447; doi:10.1136/bmjopen-2016-013021), 2017-06-23
Supplement: bmjopen-2016-013021supp001.pdf [file bmjopen-2016-013021supp001.pdf]

## Appendix I

“The Role, Process and Effect of Medical tourism in Africa: A Systematic Scoping Review”

### Data Extraction Instrument

|   |                                 | Document ID: |
|---|---------------------------------|--------------|
| 1 | Reviewer/Person extracting data |              |
| 2 | Date of Data Extraction         |              |
| 3 | Author, Year, Publication Type  |              |
| 4 | Journal/Publisher               |              |
| 5 | Title, full citation            |              |
| 6 | Funding Source (If Applicable)  |              |
| 7 | Target Participant(s)           |              |

|    |                      |   |                                                                                          |
|----|----------------------|---|------------------------------------------------------------------------------------------|
| 8  | Methodology          |   |                                                                                          |
| 9  | Method               |   |                                                                                          |
| 10 | Aims of study        |   |                                                                                          |
| 11 | Setting              |   |                                                                                          |
| 12 | Geographical Context |   |                                                                                          |
| 13 |                      |   |                                                                                          |
| 14 | Relevant Findings on | a | MT Advertising and Distribution Channels(Agencies, Hospital reps, Internet, other media) |
|    |                      | b | MT Regulatory Conditions                                                                 |
|    |                      | c | Ethical Issues                                                                           |
|    |                      | d | Hospital/Physician Specialty                                                             |

|        |                      |   |                                                                                                  |  |
|--------|----------------------|---|--------------------------------------------------------------------------------------------------|--|
|        |                      | e | Hosp./Physician Accreditation                                                                    |  |
|        |                      | f | Medical Service and Procedure Prices                                                             |  |
|        |                      | g | Main MT Actors                                                                                   |  |
|        |                      | h | Infrastructure /Superstructure (Hospitals, Clinics, Private Participation, Public Participation) |  |
|        |                      | i | MT Promotion                                                                                     |  |
|        |                      |   | Any MT Benefits, Costs, Prospects or Challenges identified                                       |  |
|        |                      | j | MT Product Differentiation (Add-ons, Language used)                                              |  |
| 1<br>5 | Reviewer<br>Comments |   |                                                                                                  |  |

**Notes:**

**Methodology:** Theoretical underpinnings of the research; also whether the nature of the research is sociological, medical, legal etc

**Method:** How the data was collected; data collection tools.

**Setting:** Seeks to identify cultural features such as employment, lifestyle, ethnicity, age, gender, socio-economic class, location and time.

**Participants:** Information related to the inclusion and exclusion (Sampling) criteria of the research, includes descriptions of age, gender, number of included subjects, ethnicity, level of functionality, and cultural background, if available.

**Promotion:** Includes Promotional Strategies by Local/National Governments, Hospital Boards, Tourism Boards; Special Task Force Committees; Overseas Promotion; National Campaigns and Quality (Accreditation, Certification).
